# Supplementary material
Source: PubMed Central journal article supplement (PMC7132633)
Supplement: NIHMS1573143-supplement-Supp__Material.pdf [file NIHMS1573143-supplement-Supp__Material.pdf]

## Supplementary Materials for

### Retinol binding protein 3 is increased in the retina of patients with diabetes resistant to diabetic retinopathy

Hisashi Yokomizo, Yasutaka Maeda, Kyoungmin Park, Allen C. Clermont, Sonia L. Hernandez, Ward Fickweiler, Qian Li, Chih-Hao Wang, Samantha M. Paniagua, Fabricio Simao, Atsushi Ishikado, Bei Sun, I-Hsien Wu, Sayaka Katagiri, David M. Pober, Liane J. Tinsley, Robert L. Avery, Edward P. Feener, Timothy S. Kern, Hillary A. Keenan, Lloyd Paul Aiello, Jennifer K. Sun, George L. King\*

\*Corresponding author. Email: [george.king@joslin.harvard.edu](mailto:george.king@joslin.harvard.edu)

Published 3 July 2019, *Sci. Transl. Med.* **11**, eaau6627 (2019)  
DOI: 10.1126/scitranslmed.aau6627

#### The PDF file includes:

##### Materials and Methods

Fig. S1. Specificity of hRBP3 ELISA, human vitreous IL-6 concentrations, and effects of intravitreal (IVT) injection with rhRBP3 in rats.

Fig. S2. Effects of IVT injection with rhRBP3 on retinal thickness by OCT at 2 months after diabetes in rats.

Fig. S3. Establishment of subretinal overexpression of hRBP3 in rats and effects of diabetes on degradation of RBP3 in rat retina.

Fig. S4. Establishment of Tg mice with hRBP3 overexpression in retina.

Fig. S5. Effects of hRBP3 on VEGF- and FGF-induced migration.

Fig. S6. Effects of rhRBP3 on HG induced *Vegf* and *Il-6* mRNA expression.

Fig. S7. Glucose transporter gene expressions and effects of rhRBP3 on 3-O-MG and 2DG uptake.

Fig. S8. Effects of human vitreous or different peptide of hRBP3 on 2DG uptake, VEGF-induced pTyr-VEGFR2, and palmitate-induced OCR.

Fig. S9. Human vitreous RBP3 concentrations and HbA1c.

Fig. S10. Effects of rhRBP3 or Medalist patient vitreous from protected eye on endothelial migration.

Table S1. Clinical and demographic characteristics by disease status for Medalist patients included in proteomic analysis by mass spectroscopy.

Table S2. Four candidates of up-regulated proteins selected by proteomic analysis in retina and vitreous of Medalist patients with no-mild NPDR ( $n = 6$ , protected) versus PDR ( $n = 11$ , nonprotected).

Table S3. RBP3 protein was selected from among the four candidates in table S2.

Table S4. Clinical and demographic characteristics by disease status for individuals included in proteomics and ELISA assays.

Table S5. Up-regulated proteins in the retina from Joslin Medalist patients: protected versus nonprotected.

Table S6. Up-regulated proteins in the vitreous from Joslin Medalist patients: protected versus nonprotected.

Table S7. Primers sequences used in reverse transcription polymerase chain reaction.

References (30–40)

**Other Supplementary Material for this manuscript includes the following:**

(available at [stm.sciencemag.org/cgi/content/full/11/499/eaau6627/DC1](http://stm.sciencemag.org/cgi/content/full/11/499/eaau6627/DC1))

Table S8. Raw data (Excel file).

Data file S1 (Microsoft Word file). Full immunoblot and silver staining.

## Materials and Methods

**Proteomic analysis.** Post-mortem ocular globes from medalist patients were procured  $\approx 10$  hours after death and shipped on ice. Approximately 1-1.5 cc of vitreous and retina were extracted from each eye and frozen at  $-80^{\circ}\text{C}$ . Retinal lysate (120  $\mu\text{g}$ ) and vitreous (20  $\mu\text{l}$ ) was separated by 10% SDS-PAGE, stained with Coomassie Blue and analyzed by LC-MS/MS using a linear ion-trap mass spectrometer as described before (28). Complete proteomic peptide hits are included in tables S5 and S6.

**Collection of validation specimens.** RBP3 was quantified in the vitreous from 54 medalist patients and other diabetic patients with type 1 and 2 diabetes. This group consists of non-diabetic controls (NDM,  $n$  [participants]=13), no-mild nonproliferative DR (no-mild NPDR,  $n=19$ ), moderate NPDR ( $n=8$ ) and PDR ( $n=14$ ). DR status was assessed in non-medalist patients by clinical examinations as reported by medical record (8). PDR includes some patients with the history of treatment with laser photocoagulation. RBP3 concentrations in the vitreous were determined by specific ELISA for RBP3 as described above. Vitreous VEGF concentrations were measured by ELISA (R&D systems) in a subgroup of 43 of these individuals (NDM,  $n$  [participants]=9; no-mild NPDR,  $n=15$ ; moderate NPDR,  $n=7$  and PDR,  $n=12$ ) who had adequate volume of vitreous for the assay. Vitreous IL-6 concentrations were measured by ELISA (R&D systems) in a subgroup of 12 of these individuals (NPDR,  $n=6$ ; PDR,  $n=6$ ). For the detection of degradation of vitreous RBP3, bands ( $<135$  kDa) /all RBP3 bands were assessed by immunoblot in the vitreous from

74 medalist patients and other diabetic patients with type 1 and 2 diabetes. This group consists of NDM (n=12), no-mild NPDR (n=25), moderate NPDR (n=11), PDR (n=26).

**Establishment of transgenic mice with human RBP3 overexpression in retina.** We generated RBP3 transgenic (RBP3Tg) mice that specifically overexpressed human RBP3 to the retina (RhRBP3 Tg) using the rhodopsin promotor on a C57BL/6J background. RBP3 transgenic mice, which overexpress human RBP3 (hRBP3) was cloned into the pRho-DsRed vector (Addgene) (pRho-RBP3-Myc-T2A-DsRed) after digested with EcoRI and MluI (New England BioLabs) and driven by the mouse rhodopsin promotor. The pRho-RBP3-Myc-T2A-DsRed was microinjected into embryo of C57BL/6J as background in the Transgenic Core at Brigham and Women's Hospital. Founders were screened by genotyping with PCR using a forward primer (5'-AATAACGCCCCCAATCTCCG-3') and a reverse primer (5'-GATCGTTCAGGGAGCTCTGC-3'). The PCR conditions were 94°C for 3 minutes, followed by 35 cycles of 94°C for 30 seconds, 57°C for 30 seconds, and 72°C for 30 seconds. After 2 months of diabetes induced by STZ, retinal mRNA and protein expressions of RBP3 and VEGF (Mouse VEGF Quantikine ELISA, cat. # MMV00, R&D systems), retinal mRNA expressions of IL-6 as well as analysis of retinal functions by ERG, structures by OCT, and RVP were assessed. Retinal vascular pathology was assessed at six months after STZ injection by identification of acellular capillaries per square millimeter of retinal area.

**Establishment of Specific ELISA for RBP3.** Nunc ELISA/EIA 96 well plates (Thermo Fisher Scientific) were coated with a 100 µl of polyclonal RBP3 antibody in filtered PBS (4 µg/mL/well, ProteinTech) and incubated overnight at room temperature (RT). Plates were washed 3 times with 400 µl/well of washing buffer including 0.05% Tween-20 and 0.01% SDS and blocked with 300 µl/well of dilution buffer containing 5% of Tween-20 for 30 minutes at 37°C. Duplicates of 100 µl of serially diluted rhRBP3 peptides (Origene) as a standard, human vitreous samples (1/10 dilution) and the same amount concentration of IgG (1 µg/mL), albumin (1 µg/mL) and RBP4 peptides (1 µg/mL) as a negative control were loaded on the same plate. After 1 hour incubation at 37°C, the plates were washed 5 times with 400 µl/well of washing buffer and incubated with 100 µl of biotinylated monoclonal RBP3 antibody (2 µg/mL/well, Sigma-Aldrich) for 1 hour at 37°C. Plates were washed 5 times with 400 µl of washing buffer and incubated with 100 µl of Streptavidin-HRP (1:200, R&D systems) for 30 minutes at 37°C. After 30 minutes incubation at 37°C, the plates were washed and incubated with 100 µl/well of TMB for 10-20 minutes at RT. The reaction was stopped with 50 µl of 1 M H<sub>2</sub>SO<sub>4</sub> and absorbance was read at 450 nm using a Plate Reader (Promega).

**Reagents.** Heparin (cat. # H3149), bovine serum albumin (BSA, cat. # A7888), Streptozotocin (STZ), and Cytochalasin B (cat. # C2743), rotenone (cat. # R8875), and antimycin A (cat. # A8674) were purchased from Sigma-Aldrich. Endothelial cell growth

supplement (ECGS, cat. # J64516) was purchased from Roche Applied Science. RIPA buffer (cat. # BP-115) was purchased from Boston Bioproducts. Protease inhibitor (cat. # 11836153001) was purchased from Roche Diagnostics. Phosphatase inhibitor (cat. # 78420) was purchased from Thermo Scientific. STF31 (cat. # sc-364692) was purchased from Santa Cruz Biotechnology. Antibodies used for specific ELISA assay for RBP3 were: polyclonal RBP3 antibody as a capture antibody was purchased from ProteinTech (cat. # 14352-1-AP); monoclonal RBP3 antibody as a detection antibody was purchased from Sigma-Aldrich (cat. # WH0005949M1). Antibodies used for immunoprecipitation were: VEGFR2 antibody (cat. # sc-504) was purchased from Santa Cruz Biotechnology; Anti-RBP3 antibody (cat. # 14352-1-AP) was from Proteintech; Anti-GLUT1 antibody (cat. # NB300-666) was from Novus Biologicals. Antibodies used for immunoblots are as follows: Anti-RBP3 antibodies were from Abcam (cat. # ab101456), from Proteintech (cat. # 14352-1-AP) and from Sigma-Aldrich (cat. # WH0005949M1); Phospho-tyrosine antibody (cat. # 05-321) was from Millipore; VEGFR2 antibody (cat. # 05-554) was from Upstate; Anti-GLUT1 antibody (cat. # NB300-666) was from Novus Biologicals. Anti-Myc-Tag (cat. # 2272) were from Cell Signaling Technology. Anti-human retinol-binding protein antibody (cat. # A0040) was from Dako. VEGF (cat. # sc-152) and HRP-conjugated anti- $\beta$ -Actin (cat. # sc-47778) were purchased from Santa Cruz. Recombinant human protein are as follows: recombinant human RBP3 protein (rhRBP3, cat. # TP603816) from human HEK293 cells was obtained from

Origene Technologies. Recombinant human VEGF 165 (rhVEGF, cat. # 293-VE-010) and recombinant human RBP4 protein (rhRBP4, cat. # 3378-LC) were purchased from R&D Systems. Different peptides of RBP3 were: rhRBP3 (aa19-320, 34 kDa, D1, cat. # LS-G12036) was obtained from LSBio, Inc and rhRBP3 (aa321-630, 35 kDa, D2, cat. #ab215617) was obtained from Abcam.

**Cell cultures.** Cells were maintained at 37 °C in a humidified atmosphere of 5% CO<sub>2</sub>.

**Bovine retinal endothelial cells (BRECs) and bovine aortic endothelial cells (BAECs).**

Primary cultures of BREC and BAEC were isolated as reported previously (30). BREC and BAEC were grown in DMEM with 10% horse serum, 100 µg/ml heparin and 50 µg/ml endothelial cell growth supplement on 0.2% gelatin-coated dishes. We used cells from passages 3 through 6. Serum free DMEM with 0.1% BSA was used for overnight starvation.

**Müller cell.** Müller cell (cat. # ENW001, Kerafast) were cultured in DMEM containing 10% Fetal Bovine Serum (FBS) and 1% penicillin/streptomycin.

**Y79 cell.** Y79 human retinoblastoma cells (cat. # HTB-18, ATCC) were grown in RPMI-1640 medium supplemented with 10% FBS and 1% penicillin/streptomycin. Y79 cells were seeded in plates previously coated with poly-L-Lysine (cat. #0403, Sciencell, ScienCell Research Lab.) for experiments.

**RPE cell.** Human retinal pigmented epithelium (RPE) cells (cat. #6540, ScienCell Research Lab.) were maintained in epithelial cell medium (EpiCM, cat. #4101, ScienCell Research

Lab.) supplemented with 10 % FBS, 1x epithelial cell growth supplement (EpiCGS, cat. #4101, ScienCell Research Lab.) and 1% penicillin/streptomycin. Cells were seeded in plates previously coated with poly-L-Lysine (cat. #0403, ScienCell Research Lab.) for experiments

**C2C12 myoblast.** C2C12 myoblasts (ATCC) were cultured in DMEM containing 10% FBS, 25 mM glucose (HG) and 1% penicillin/streptomycin for proliferation. Differentiation was induced by incubating the cells in DMEM containing 2% horse serum, HG and 1% penicillin/streptomycin for 8 days.

**WT-1 cell.** Immortalized brown preadipocytes (WT-1) were cultured in DMEM containing HG supplemented with GlutaMAX 10% FBS. For adipogenic induction, WT-1 cells were seeded at a density of  $1 \times 10^5$  cells/cm<sup>2</sup>. Two days later when cells were fully confluent, cells were then exposed to an induction cocktail for two days, which consisted of 0.5 mM of 3-isobutyl-1-methylxanthine (IBMX), 125  $\mu$ M of indomethacin, 5  $\mu$ M of dexamethasone, 20 nM of insulin and 1 nM of T3 in HG DMEM, followed by a six-day maintenance phase (DMEM containing HG, 20 nM of insulin and 1 nM of T3).

**Cell-based assays.** Purity of recombinant human RBP3 protein (rhRBP3), obtained from Origene Technologies, was determined by Coomassie blue staining and SDS-PAGE gel. Scratch assay assessed migration, as published (31). Cells were grown to confluence on 0.2% gelatin-coated 35 mm plates in growth media. Confluent cells were starved in DMEM/0.1%

BSA overnight. Scratch wounds were created in confluent monolayers using a sterile p200 pipette tip. Perpendicular marks were placed at intervals of 1 mm across each scratch on the external surface of the well. After the suspended cells were washed, the wounded monolayers were incubated in each conditions of test medium in DMEM/0.1% BSA media. Osmotic pressure was adjusted in low glucose conditions by adding 19.4 mM mannitol. Every 6 hours up to 24 hours, repopulation of the wounded areas was observed under phase-contrast microscopy (Olympus). Using the NIH ImageJ image processing program, the size of the denuded area was determined at each time point from digital images. The percentage of migration area was calculated as the ratio of covered area (original wound area - open wound area) to the original wound area. Effects of rhRBP3 (0.25 µg/mL) or medalist patient vitreous with high RBP3 expression from protected eyes on high glucose (25 mM glucose, HG)- or VEGF (2.5 ng/mL)-induced endothelial migration were measured in BRECs. Anti-RBP3 antibody was added as a neutralizing antibody (1 µg/mL). 17.2 mg/mL of BSA was added in the group of BSA, VEGF+BSA and Anti-RBP3+BSA while 8.6 mg/mL of BSA was added in the group of Vitreous+BSA, VEGF+Vitreous+BSA and VEGF+Vitreous+Anti-RBP3+BSA. The effects of hRBP3 on tyrosine phosphorylation and protein expression of VEGFR2 (Flk) in BREC were assessed by immunoprecipitation (IP) with a VEGFR2 antibody (cat. # sc-504, Santa Cruz Biotechnology) followed by immunoblotting (IB) with a phospho-tyrosine antibody (cat. # 05-321, Millipore) or VEGFR2 antibody (cat. # 05-554, Millipore) as

previously described (32). Cells were incubated with vehicle, rhVEGF, rhRBP3, both of rhVEGF and rhRBP3 for 10 minutes after overnight starvation in DMEM with 0.1% BSA. Both of rhVEGF and rhRBP3 were kept at RT for 10 minutes respectively, and then cells were incubated at the same time (Co-addition). Both of rhVEGF and rhRBP3 were premixed at RT for 10 minutes, and then cells were incubated (Pre-incubation). Then, cells were washed with ice-cold PBS and lysed immediately with RIPA buffer including protease inhibitor and phosphatase inhibitor. Cell lysates were immunoprecipitated (IP) with a VEGFR2 antibody followed by immunoblotting (IB). Ratio of tyrosine phosphorylation to total VEGFR2 was quantified by immunoblot and shown as fold-change to basal condition.

**Reverse transcription and quantitative real-time PCR analysis.** Total RNA was extracted from the retina and cells using RNeasy mini kit (Qiagen), and cDNA was synthesized as previously described (33). All mRNA expressions were normalized to 18S and quantified using the threshold cycle method (34). PCR primers used in the study are listed in table S7.

**Immunoblotting.** The immunoblot analysis was described previously (35). Briefly, retina lysates or cell lysates were loaded on an SDS-PAGE gel and electroblotted onto a nitrocellulose membrane. After blocking, the membranes were incubated with antibodies. Degradation of RBP3 was calculated as bands <135kDa / all RBP3 bands in each blot. The quantifications of western blotting were performed using ImageJ. Uncropped western gels are shown in Datafile S1.

**High glucose (HG) effects in Müller cell.** LG or HG was added in Müller cell with rhRBP3 (0, 0.5, 2.5 µg/mL) for 24 hours in DMEM with 3%FBS. 10 µM of STF31 was added as a GLUT1 inhibitor. 100 nM of PMA was added for 3 hours.

**Crosslinking.** Müller cells were incubated with BSA, boiled rhRBP3, and rhRBP3 for 1 hour at 37 °C, followed by the addition with 2 mM of DTSSP crosslinker (cat. # 21578, Fisher) for 2 hours or Formaldehyde for 30 minutes at 4 °C. After subcellular fractionation (cat. # 78840, Fisher), isolated membrane was immunoprecipitated (IP) with GLUT1 antibody (cat. # NB300-666, Novus Biologicals) or RBP3 antibody (cat. # 14352-1-AP, Proteintech), then immunoblot (IB) was performed.

BRECs were incubated with RBP4, RBP3, and PBS for 1h in 0.2%BSA+DMEM-LG after a 16 hour starvation with 0.2%BSA+DMEM-LG, followed by washing by PBS, then rhVEGF (2.5 ng/mL) was added for 10min in 0.2%BSA+DMEM-LG. Cells were washed by PBS, followed by the addition with 2mM of DTSSP for 2h at 4 °C. Cell lysates were IP with VEGFR2 antibody, then IB was performed.

**Silver staining.** After electrophoresis of the proteins in the polyacrylamide gel, silver staining is performed by silver stain kit (cat. # PROT-SIL2, Sigma-Aldrich) according to manufacturer's instructions.

**Radioactive materials.**

3-*O*-[<sup>3</sup>H]methyl-D-glucose ([<sup>3</sup>H]3-*O*-MG, cat. #NET379001MC) and

2-deoxy-D-1- $^3\text{H}$ glucose ( $^3\text{H}$ 2DG, cat. #NET328A001MC) were obtained from PerkinElmer.

**Measurement of 3-*O*-MG uptake.** The cells were rinsed 5 times with PBS and incubated with the assay medium (0.1% BSA+PBS+1 mM of  $\text{CaCl}_2$  and 2.5 mM of  $\text{MgSO}_4$ ) containing rhRBP3 (0, 0.25  $\mu\text{g/mL}$ ) for 1 hour at 37 °C, and incubated with 0.1 mM of 3-*O*-MG, 2  $\mu\text{Ci}$  of  $^3\text{H}$ 3-*O*-MG for 1 minute at RT. Noncarrier-mediated uptake was determined in incubations containing 10  $\mu\text{M}$  of cytochalasin-B for 5 minutes. The uptake was terminated by the addition of 50  $\mu\text{M}$  of cytochalasin-B for 30 seconds, followed by 5 washes with ice-cold PBS. After washes, cell associated radioactivity was solubilized in 50 mM of NaOH, and taken for liquid scintillation counting. Results shown are corrected for total cellular protein content, as assessed by the bicinchoninic acid (BCA) assay (ThermoFisher Scientific).

**Measurement of 2DG uptake.** The cells were rinsed and incubated with the assay medium as described above containing several concentrations of rhRBP3 for 1 hour at 37 °C, and then incubated with 0.1 mM of 2DG, 1  $\mu\text{Ci}$  of  $^3\text{H}$ 2DG for 5 minutes at RT. Noncarrier-mediated uptake was determined in incubations containing 10  $\mu\text{M}$  of cytochalasin-B for 5 minutes. 10  $\mu\text{M}$  of STF31 (cat. # sc-364692, Santa Cruz Biotechnology) was used as a GLUT1 inhibitor for 5 minutes. Anti-RBP3 antibody was added as a neutralizing antibody (1  $\mu\text{g/mL}$ ). The uptake was terminated by 5 washes with ice-cold PBS. After washes, the cells were processed for liquid scintillation counting. Results shown are corrected for total cellular protein content

as described above.

**Measurement of 2DG uptake with different fragment of RBP3.** Different molecular sizes of RBP3 such as rhRBP3 (aa19-320, 34 kDa, D1, cat. # LS-G12036, LSBio, Inc) and rhRBP3 (aa321-630, 35 kDa, D2, cat. #ab215617, Abcam) were used. Müller cells were rinsed and incubated with 40 nM of rhRBP4 (RBP4, 22 kDa, cat. #3378-LC, R&D Systems), 40 nM of full length of rhRBP3 (full, 135 kDa, cat. # TP603816, Origene Technologies), and 40 nM of different peptides of rhRBP3 (D1, D2, and combination with D1 and D2) for 1 hour at 37 °C after a 4 hour starvation with 0.2%BSA+DMEM-L, and then incubated with 0.1 mM of 2DG, 1 µCi of [<sup>3</sup>H]2DG for 5 minutes at RT. 10 µM of STF31 was used as a GLUT1 inhibitor for 5 minutes. [<sup>3</sup>H]2DG uptake was terminated by 5 washes with ice-cold PBS. After washes, the cells were processed for liquid scintillation counting. Results were corrected for total cellular protein content as described above.

**Extracellular acidification rate (ECAR).** All ECAR were measured by a Seahorse XFe96 Flux Analyzer (Agilent Technologies). In vitro study, Müller cells were seeded into a 96-well plate 1 day before measurement. Cells were incubated with vehicle, boiled rhRBP3 (b-RBP3), or rhRBP3 (RBP3) for 1 hour in assay medium (0.2%BSA+KRB buffer: 110 mM of NaCl, 4.7 mM of KCL, 2 mM of MgSO<sub>4</sub>, 1.2 mM of Na<sub>2</sub>HPO<sub>4</sub>, and 0.24 mM of MgCL<sub>2</sub>, pH7.4) before measurement. For ex vivo study, whole retinas were isolated from mice after 4 months duration of diabetes. One fourth of the retina was loaded into the 96-well plate and was

incubated in the assay medium for 1 hour before measurements. No glucose was included in the assay medium. Data are calculated after the addition of LG, HG, rotenone (0.5  $\mu$ M or 2.0  $\mu$ M) and antimycin A (0.5  $\mu$ M or 2.0  $\mu$ M), 2DG (50 mM or 100 mM) for Müller cell or retina, respectively, and corrected for total protein content measured by BCA assay. For each experiment, the means from 2- 4 replicate wells were recorded.

**In vivo study.** Insulin deficient diabetic rats were produced by intraperitoneal injection of streptozotocin (STZ, 55 mg/kg) after a 12 hours overnight fast at 6 weeks of age and insulin deficient diabetic mice were produced by 5 consecutive days of intraperitoneal injection of STZ (50 mg/kg) at 7 weeks of age. Diabetes is ascertained by blood glucose values > 250 mg/dl as measured by a glucometer and followed at 3-4 week intervals (36, 37). The experimental protocols were approved by the Joslin Diabetes Center Institutional Animal Care and Use Committee. The experiments were carried out in strict accordance with the recommendations in the Guide for the Care and Use of Laboratory Animals of the National Institutes of Health.

**In vivo intravitreal (IVT) injection.** IVT injections were performed by injecting 5 $\mu$ L volumes via a 32G Hamilton syringe (Hamilton Corp.) at 2 mm below the limbus of male Lewis rats at 8 weeks of age (Charles River Laboratories, Inc.), as described previously (38). In the premix study, recombinant human VEGF (rhVEGF, 200 ng/mL) and rhRBP3 (2.5  $\mu$ g/ml, 20 nM) were combined and immediately injected into the vitreous. Each rat was

infused with Evans blue dye 10 minutes after IVT injection, and 2 hours later retinal vascular permeability (RVP) was assessed (36). In an intervention study, IVT of rhVEGF (200 ng/mL) was followed 24 hours later by an IVT of vehicle, boiled rhRBP3 (2.5 µg/ml, 20 nM), or rhRBP3 (2.5 µg/ml, 20 nM). In dose dependent of rhRBP3 study, IVT of rhVEGF (200 ng/mL) was followed 24 hours later by an IVT of vehicle or rhRBP3 (1, 10, 20 nM). At 10 minutes after IVT injection with rhRBP3, each rat was infused with Evans blue dye and 2 hours later RVP was assessed. After 2 months of diabetes, vehicle, boiled rhRBP3, or rhRBP3 were IVT injected (2.5 µg/ml, 20 nM). At 3 days after IVT injection, RVP and retinal mRNA expressions of Vegf and Il-6 and retinal protein expressions of VEGF (Rat VEGF Quantikine ELISA Kit, cat. # RRV00, R&D systems) were assessed. In addition, at 3 days post IVT injection, scotopic responses of the neuroretina to maximal white light flash was measured by dark-adapted electroretinogram (ERG) (ADInstruments). Thickness of the retina and sub-layers were also evaluated by spectral domain optical coherence tomography (SD-OCT 840) and segmentation software Diver v2.4 (Bioptigen) (38). Boiled rhRBP3 was obtained by boiling with 100°C for 30 minutes, and left for 30 minutes at RT.

### **In vivo gene therapy with human RBP3.**

Subretinal overexpression of hRBP3, in male Lewis rats (Charles River Laboratories International, Inc.), was performed using lentiviral vectors expressing RBP3 or luciferase-GFP driven by CMV-promoter (39). We confirmed luciferase expression in rat eyes

at one week, three months and six months after injection using in vivo imaging system (IVIS SPECTRUM CT system; Caliper Life Sciences) with intraperitoneal injection of D-Luciferin Firefly (50 mg/g BW, Caliper Life Sciences). Luciferase-GFP was used to determine efficacy of the vector, which correlated well with the expression of RBP3.

Subretinal injections of lentivirus at the concentrations of luciferase-GFP (OD:  $2.5 \times 10^6$  IFU) and a cocktail of RBP3/luciferase-GFP (OS:  $2.25/0.25 \times 10^6$  IFU) were performed by a trans-corneal method at 2 weeks of age to express hRBP3 and luciferase reporter gene. Differences in luciferase activity between OS and OD were found because different amounts of lentivirus containing luciferase plasmid were injected to track the persistent expression of proteins by sub-retinal injections of lentivirus to assure that each eye has equal amount of virus injected, one retina was injected with both luciferase and RBP3 plasmids in the treated retina and only luciferase plasmid in the untreated retina.

At two months after diabetes, scotopic responses of the neuroretina were measured by ERG, and thickness of the retina and sub-layers were evaluated by OCT (36). Protein expressions of VEGF in retina and vitreous were assessed as described above. RVP was measured using Evans blue dye permeation (36). Retinal vascular pathology was assessed at six months after STZ injection to identify acellular capillaries per square millimeter of retinal area (40).

### **In Vivo Retinal Assessments.**

#### **Optical Coherence Tomography (OCT).**

The thickness of the total retina and retinal sub-layers were measured by spectral domain optical coherence tomography (SD-OCT 840) and segmentation software Diver v2.4 (Bioptigen) (36).

### **Electroretinogram (ERG).**

Scotopic responses of the neuroretina to maximal white light flash are measured by dark-adapted ERG (ADInstruments) at 2 months after STZ injection (36). The ERG system consists of a light stimulator (WLS-20, Mayo Co.), differential amplifier (Bio Amp), analog to digital convertor (PowerLab/4sp, ADInstruments) and software (Scope for Windows V3.6.4).

The light source consists of a white light emitting diode, contact lens with embedded gold wire electrode which connects to the stimulator. Prior to each session, the LED lens is calibrated using the WLS-20 light sensor and calibration routine.

At 2 months after STZ injection, rats were dark-adapted within the ERG room overnight. For maximum light flash stimulation, intensity of  $1.4 \times 10^4$  cd/m<sup>2</sup> with duration of 5 msec used.

The signals were filtered with a bandpass filter between 1 and 500Hz (PowerLab ML750) to reduce background noise. At least three signals were recorded with an interval of 60 seconds between stimulations. An average of all signals are used in the data analysis. Analysis of the data is performed using the ADInstruments Scope V3.6.4 software.

**Figure S1**

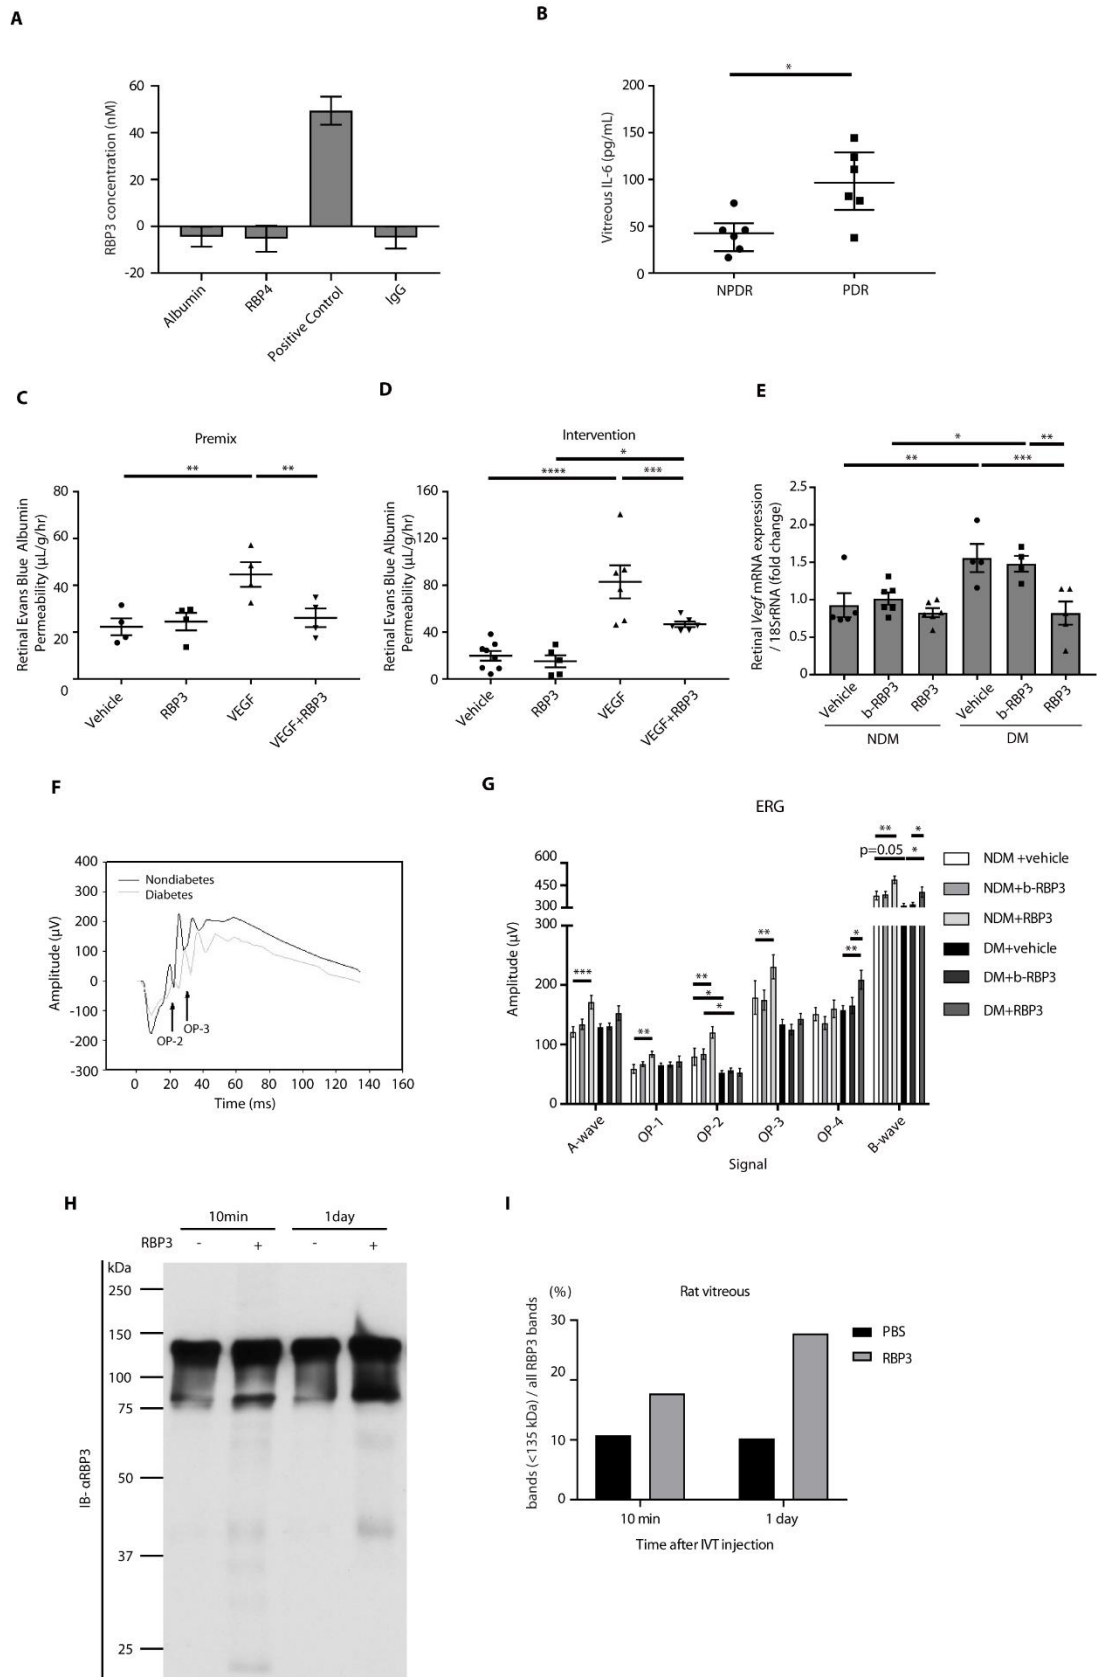

**Fig. S1. Specificity of hRBP3 ELISA, human vitreous IL-6 concentrations, and effects of intravitreal (IVT) injection with rhRBP3 in rats.**

(A) Specific and sensitivity of ELISA for RBP3. Positive control= human vitreous from NPDR.  $n = 3$ . (B) Human vitreous IL-6 concentrations from NPDR and PDR.  $n = 6$ . (C) Retinal vascular permeability (RVP) by premixed with recombinant human VEGF (rhVEGF) and rhRBP3.  $n = 4$ . (D) RVP by intervention in rat.  $n = 5-8$ . (E) Retinal Vegf mRNA expression at 2 month after STZ injection.  $n = 4-6$ . (F and G) Electroretinogram (ERG) at 2 month after STZ injection. (F) ERG at baseline. (G) ERG at 3 days after IVT injection.  $n = 9-13$ . (H and I) Degradation of vitreous RBP3 in rat at 10min and 1 day after IVT injection with rhRBP3 by immunoblot analysis.  $n = 1$ . NDM = non-diabetic rats. DM = diabetic rats. Vehicle, b-RBP3, and RBP3 = injected with vehicle, boiled rhRBP3 and rhRBP3.  $n =$  numbers of eyes. All data are represented as mean  $\pm$  SEM. Group comparison was done by ANOVA. When overall F tests were significant ( $p < 0.05$ ), Fisher's LSD test was used to determine the location of any significant pairwise differences. \*\*\*\* $p < 0.0001$ , \*\*\* $p < 0.001$ , \*\* $p < 0.01$ , \* $p < 0.05$ .

**Figure S2**

**A**

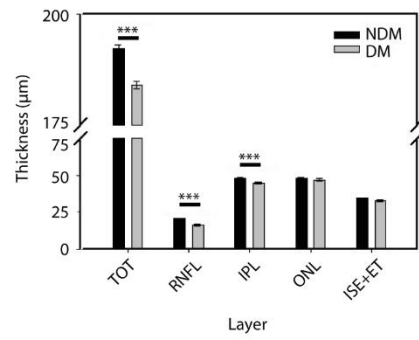

**B**

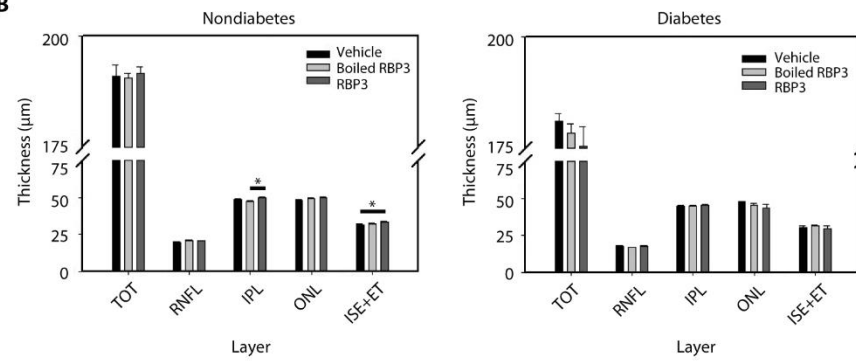

**C**

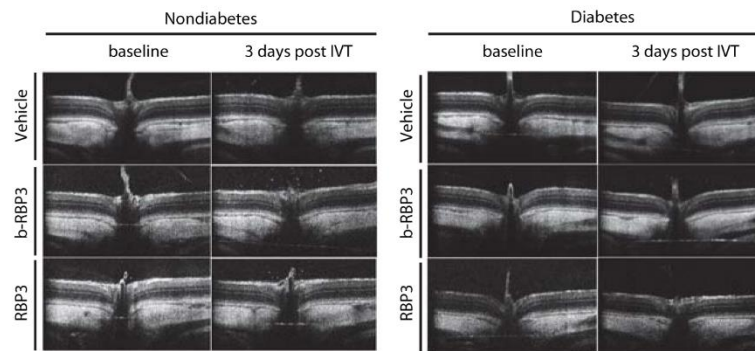

**D**

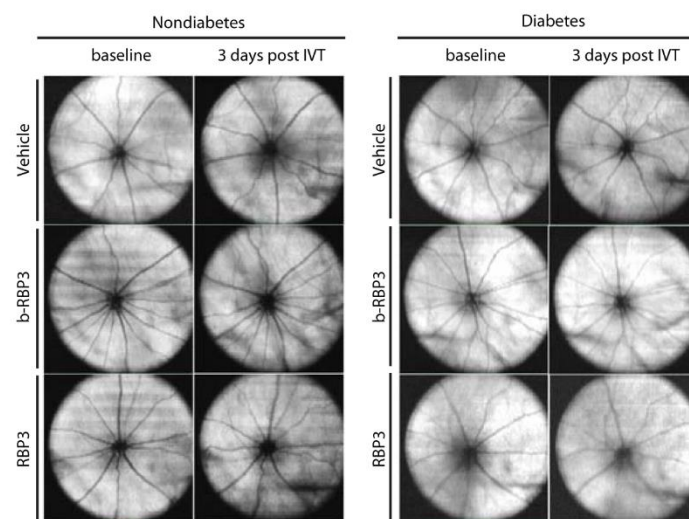

**Fig. S2. Effects of IVT injection with rhRBP3 on retinal thickness by OCT at 2 months after diabetes in rats.**

(**A**) baseline. NDM,  $n = 16$ ; DM,  $n = 21$ , (**B**) 3 days after IVT injection.  $n = 9-11$ . (**C**) OCT-B scan and (**D**) OCT-enface.  $n =$  numbers of eyes. NDM = non-diabetic rats. DM = diabetic rats.

Vehicle, b-RBP3, and RBP3 = injected with vehicle, boiled rhRBP3 and rhRBP3. All data are represented as mean  $\pm$  SEM. Group comparison was done by ANOVA (same as fig. S1).

**Figure S3**

**A**

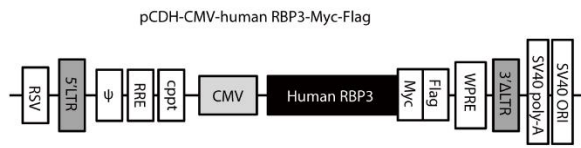

**C**

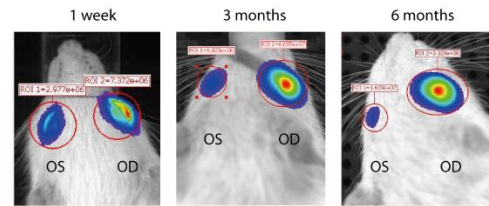

● OD : Luciferase - GFP ( $2.5 \times 10^6$  IFU/eye)  
 ● OS : RBP3 ( $2.25 \times 10^6$ ) + Luciferase - GFP ( $0.25 \times 10^6$  IFU/eye)

**B**

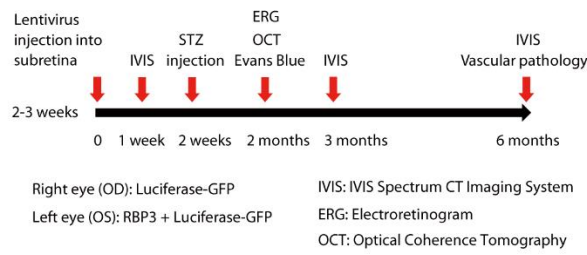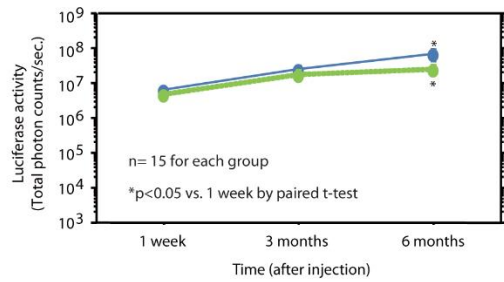

**D**

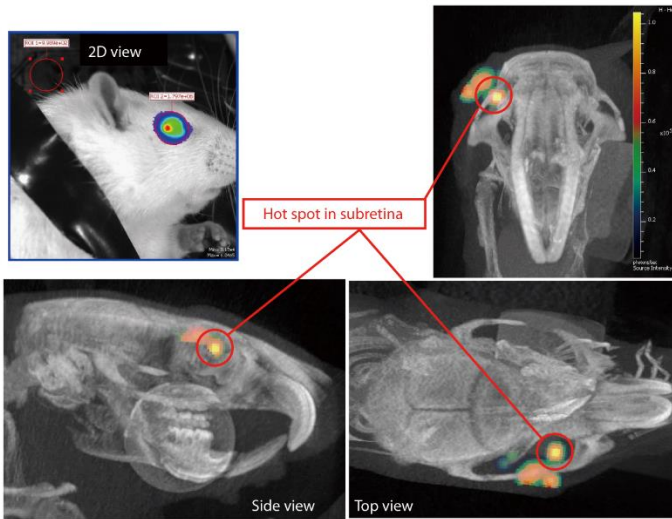

**E**

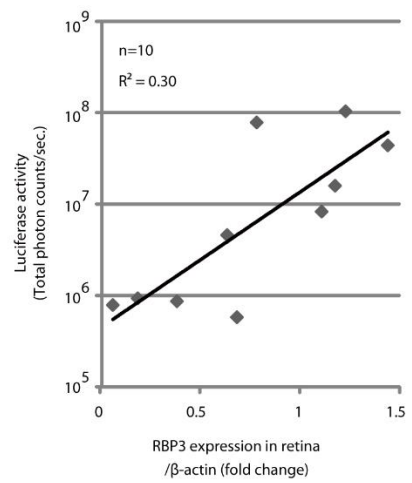

**F**

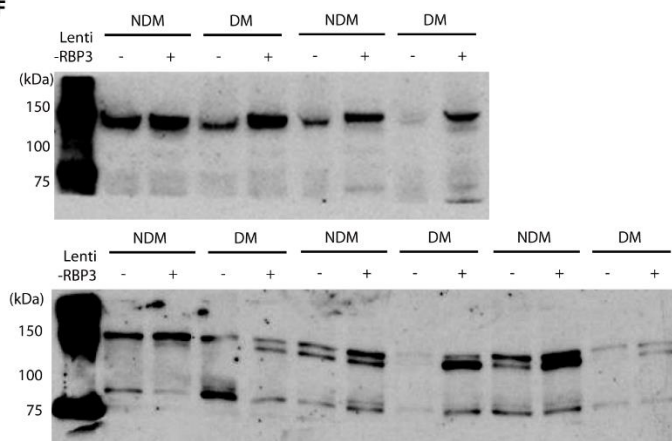

**G**

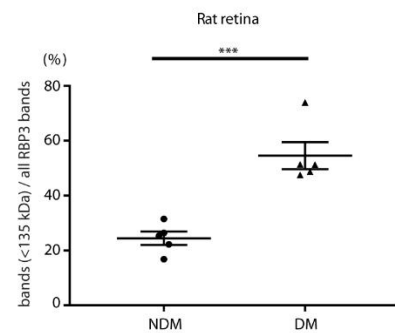

**Fig. S3. Establishment of subretinal overexpression of hRBP3 in rats and effects of diabetes on degradation of RBP3 in rat retina.**

(A) Lentiviral vector expressing hRBP3 driven by CMV-promoter. (B) Time course of overall in vivo experimental period. (C) Luciferase expression in rat eyes using in vivo imaging system (IVIS Lumina system; Caliper Life Sciences, Hopkinton, MA). OD = 15 eyes, OS = 15 eyes. p-values were calculated by linear mixed effects modeling, comparison by paired t-test were conducted to determine the location of any significant pairwise differences. (D) Co-registered optical and micro CT showing 3D localization of signal. (E) Association of luciferase activity and the expression of RBP3 in retina assessed by linear regression. N = 10 eyes. (F and G) Effects of diabetes on degradation of RBP3 by immunoblot analysis in rat retina.  $n = 5$ .  $n$  = numbers of eyes. NDM = non-diabetic rats. DM = diabetic rats. All data are represented as mean  $\pm$  SEM.

**Figure S4**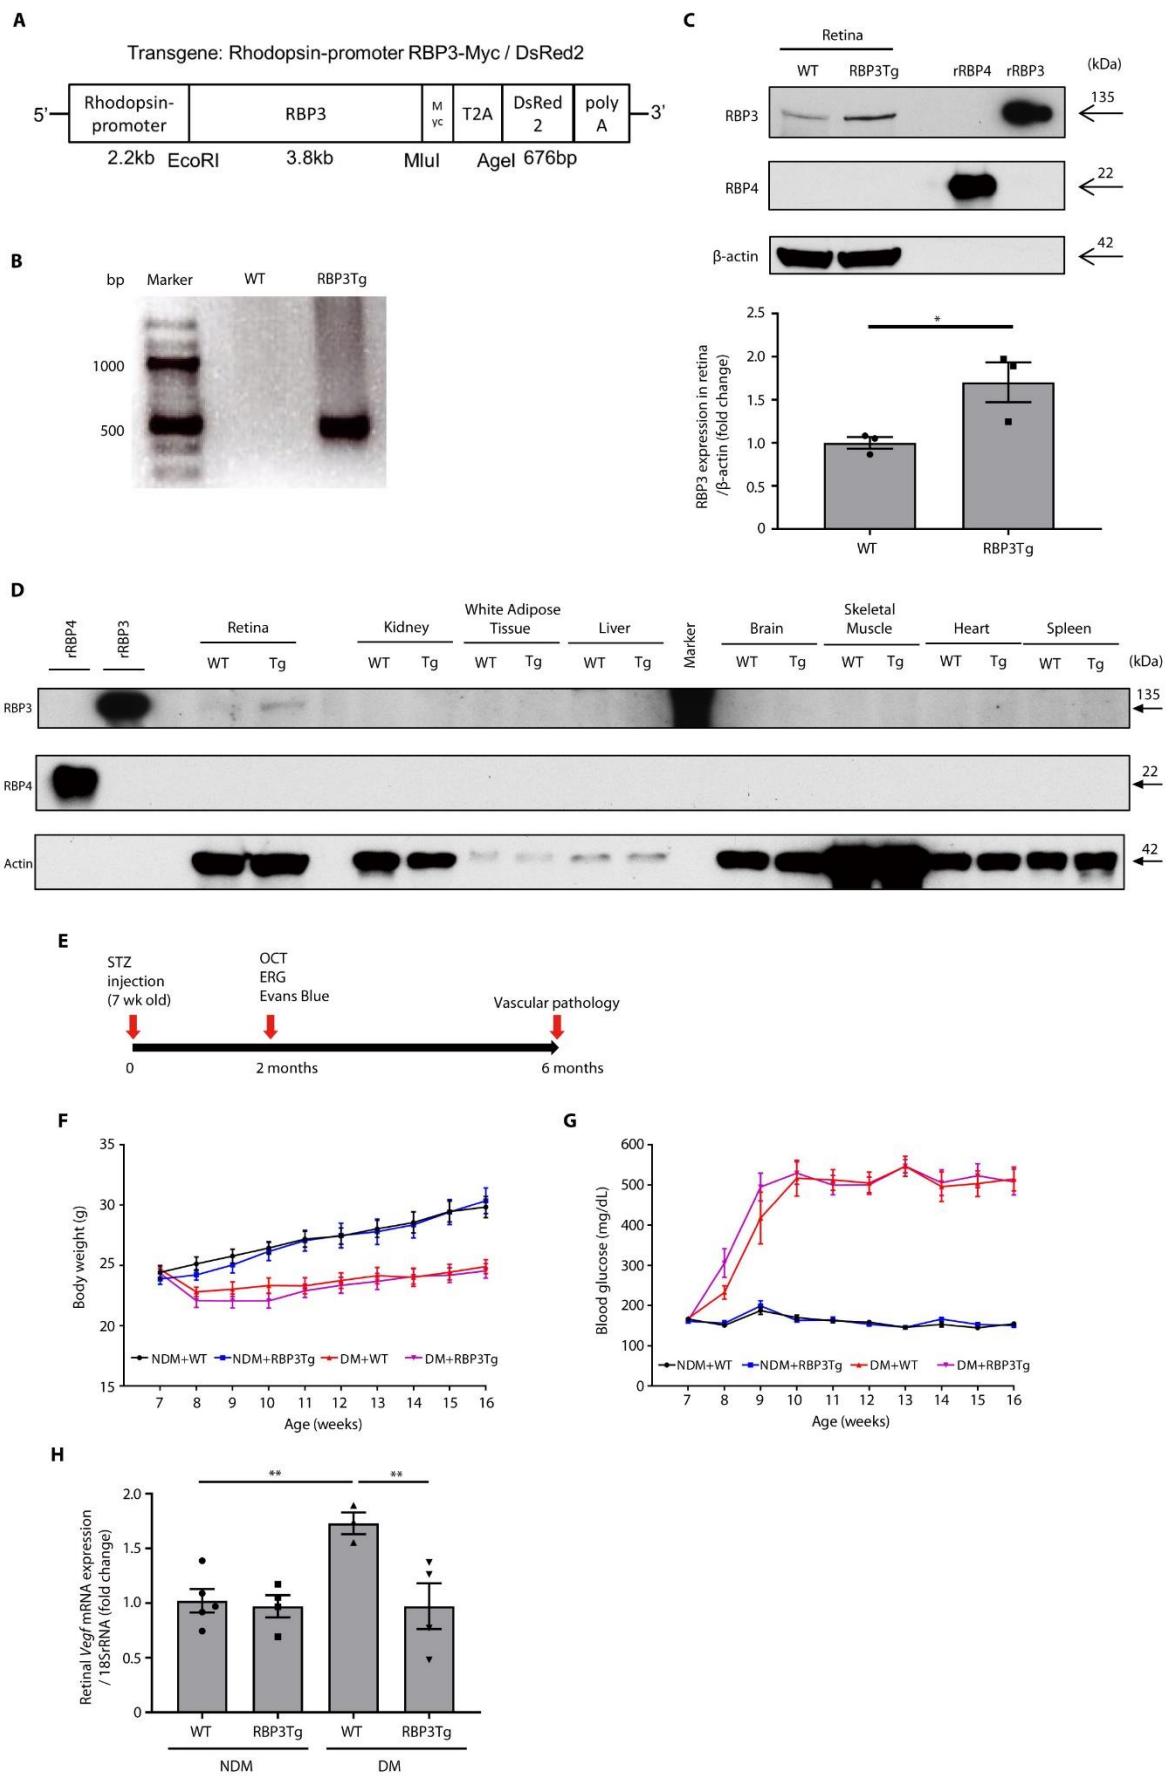

**Fig. S4. Establishment of Tg mice with hRBP3 overexpression in retina.**

(A) Rhodopsin-promoter derived RBP3 transgene. (B) Genotyping. (C and D) RBP3 expressions in (C) retina,  $n = 3$  and (D) several tissues by western blot. rhRBP3 = recombinant human RBP3. rhRBP4 = recombinant human RBP4. (E) Timeline of the in vivo experiment. (F and G) Changes of body weight and blood glucose.  $n = 7-10$ . (H) Vegf mRNA expression in retina at 2 months after diabetes.  $n = 3-5$ . WT= wild type mice, RBP3Tg= RBP3 transgenic mice, All data are represented as mean  $\pm$  SEM. Group comparison was done by ANOVA (same as fig. S1 and 2).

**Figure S5**

**A**

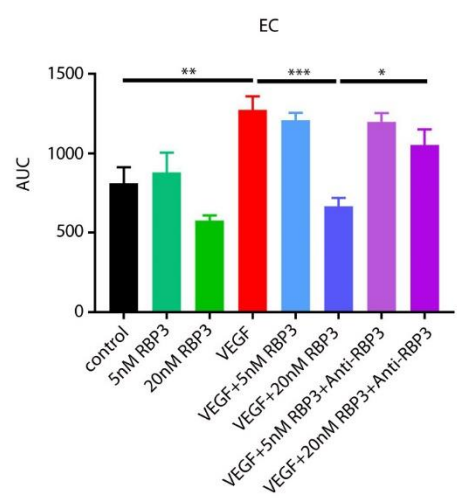

**B**

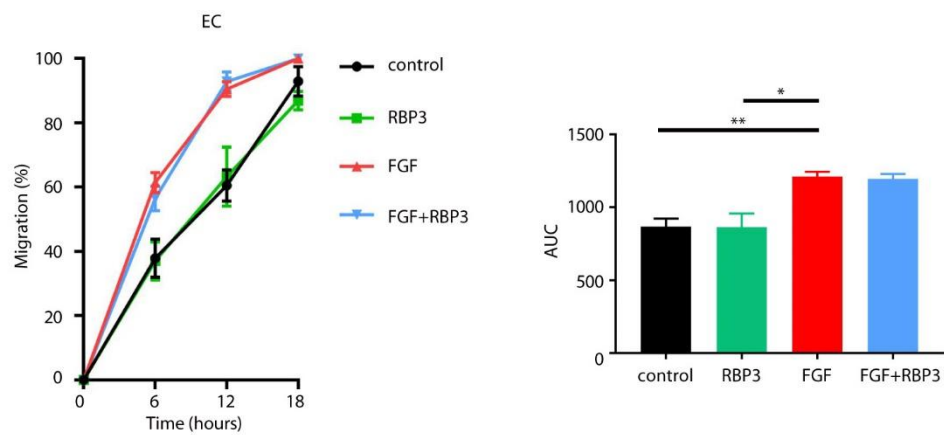

**C**

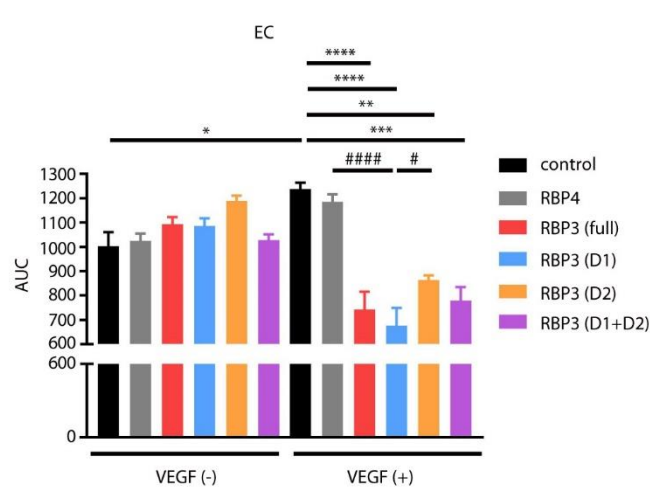

**Fig. S5. Effects of hRBP3 on VEGF- and FGF-induced migration.**

(A) Effects of rhRBP3 (5 nM or 20 nM) on rhVEGF (2.5 ng/mL)-induced endothelial migration in BREC. Area under the curve (AUC) for Fig. 5D.  $n = 4$ . (B) Effects of rhRBP3 (20 nM) on FGF (10 pg/mL)-induced endothelial migration in BAEC.  $n = 3-4$ . (C) Effects of RBP4 (20 nM) or different peptide of rhRBP3 (20 nM) on rhVEGF (2.5 ng/mL)-induced endothelial migration in BAEC. AUC for Fig. 5E. full: full length of RBP3. D1: fragment of RBP3 (AA19-320, domain 1). D2: fragment of RBP3 (AA321-630, domain 2).  $n = 4$ . All data are represented as mean  $\pm$  SEM. Group comparison was done by ANOVA (same as fig. S1, S2 and S4). (C) \* $p < 0.05$ , \*\* $p < 0.01$ , \*\*\* $p < 0.001$  and \*\*\*\* $p < 0.0001$  versus VEGF+control; # $p < 0.05$ , ## $p < 0.01$ , ### $p < 0.001$  and #### $p < 0.0001$  versus VEGF+RBP3 (D1).

**Figure S6**

**A**

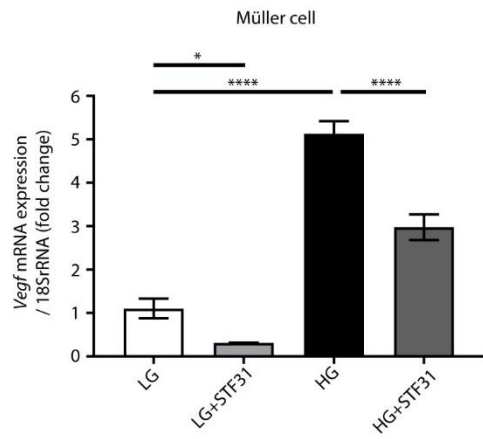

**B**

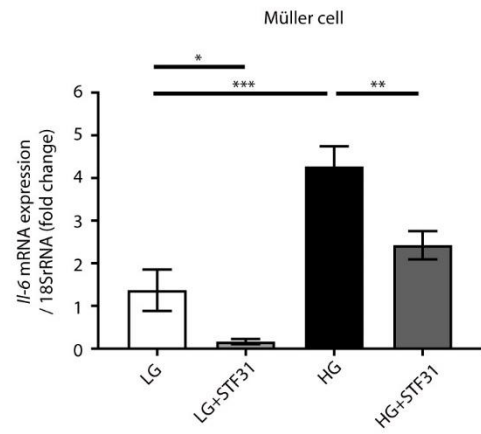

**C**

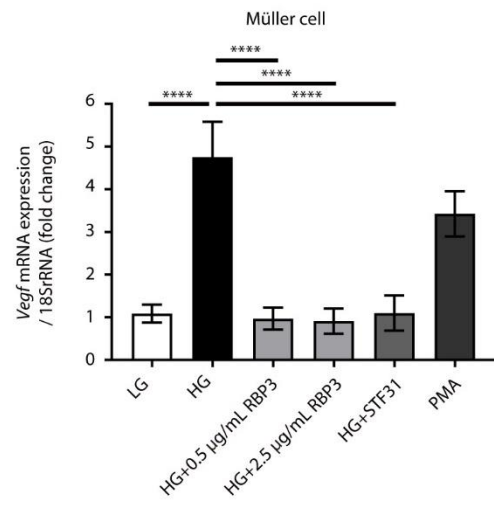

**D**

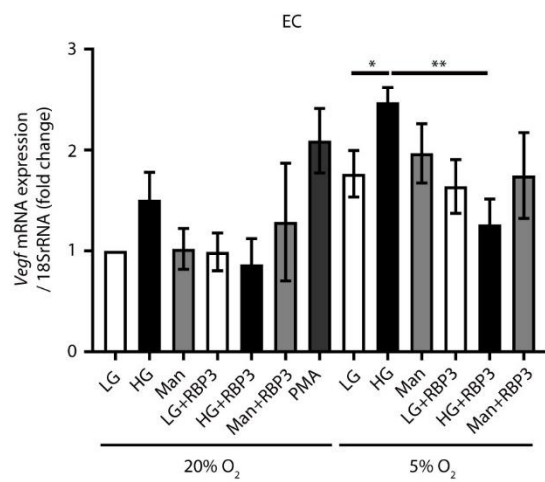

**E**

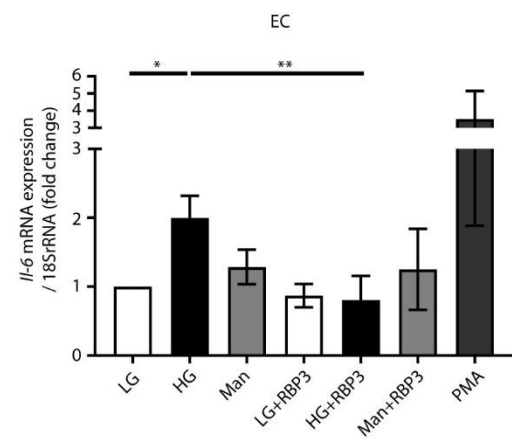

**Fig. S6. Effects of rhRBP3 on HG induced *Vegf* and *Il-6* mRNA expression.**

(A and B) *Vegf* and *Il-6* mRNA expression in Müller cell.  $n = 4$ . (C) Effects of rhRBP3 on HG induced *Vegf* mRNA expression in Müller cell.  $n = 6$ . (D and E) Effects of rhRBP3 on HG induced *Vegf* and *Il-6* mRNA expression in BREC. rhRBP3 (RBP3, 0.25  $\mu\text{g/mL}$ ).  $n = 4$ . LG = 5.6 mM glucose. HG = 25 mM glucose. Man = 25 mM Mannitol. 10  $\mu\text{M}$  STF31 was added as a GLUT1 inhibitor. 100 nM of PMA was added for 3 hours. All data are represented as mean  $\pm$  SEM. Group comparison was done by ANOVA (same as fig. S1, S2, S4 and S5).

**Figure S7**

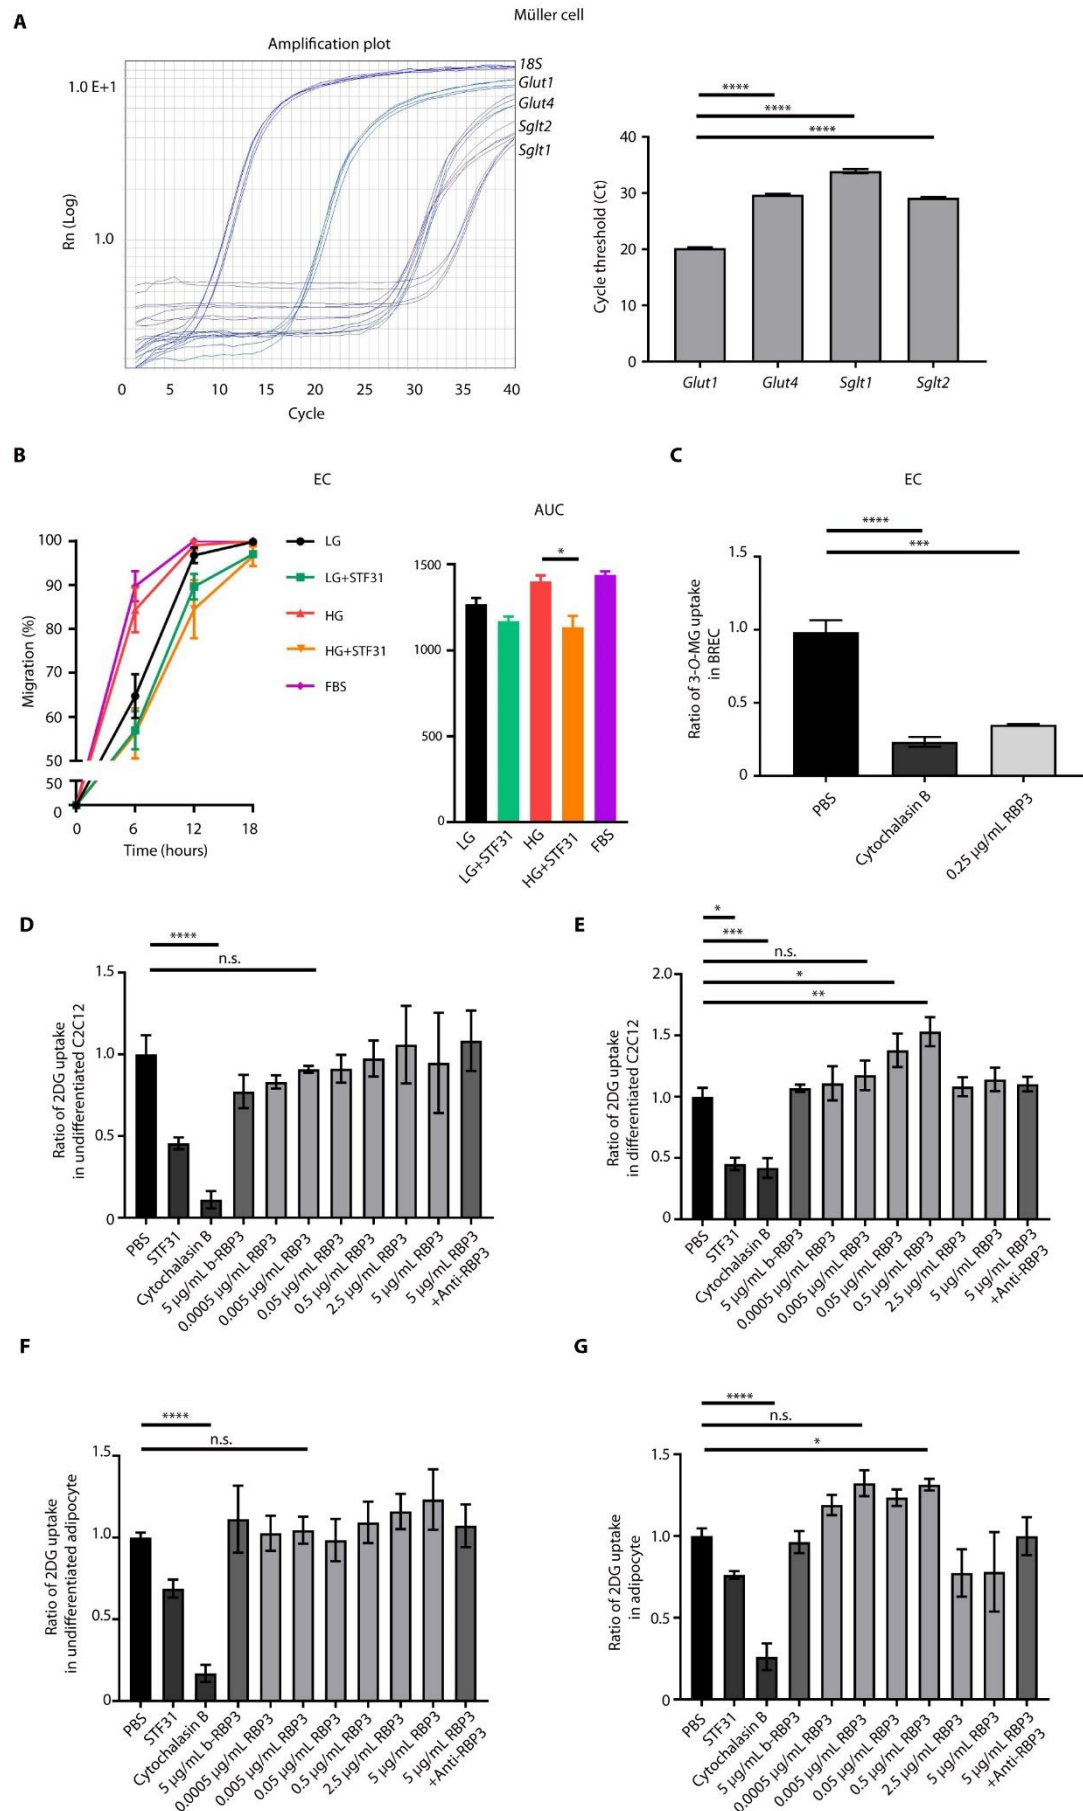

**Fig. S7. Glucose transporter gene expressions and effects of rhRBP3 on 3-O-MG and 2DG uptake.**

(A) Amplification plot and cycle threshold of potential glucose transporter gene expressions using qRT-PCR in Müller cell.  $n = 4$ . (B) Effects of STF31, GLUT1 inhibitor (10  $\mu$ M), on low glucose (LG, 5 mM) or high glucose (HG, 25 mM)-induced migration in BAEC.  $n = 3$ . (C) Effects of rhRBP3 on 3-O-MG uptake in BREC.  $n = 3$ . (D to G) Effects of rhRBP3 on 2DG uptake; (D) Undifferentiated C2C12.  $n = 3-7$ ; STF31 ( $n = 2$ ). (E) Differentiated C2C12.  $n = 3-7$ ; STF31 ( $n = 2$ ). (F) Undifferentiated adipocyte.  $n = 3-6$ . (G) Differentiated adipocyte.  $n = 3-6$ ; STF31 ( $n = 2$ ). b-RBP3 = boiled RBP3. All data are represented as mean  $\pm$  SEM. Group comparison was done by ANOVA (same as fig. S1, S2 and S4-S6). (A) \*\*\*\* $p < 0.0001$  versus *Glut1*. (B) \* $p < 0.05$  HG versus HG+STF31. (C-G) \* $p < 0.05$ , \*\* $p < 0.01$ , \*\*\* $p < 0.001$  and \*\*\*\* $p < 0.0001$  versus PBS.

**Figure S8**

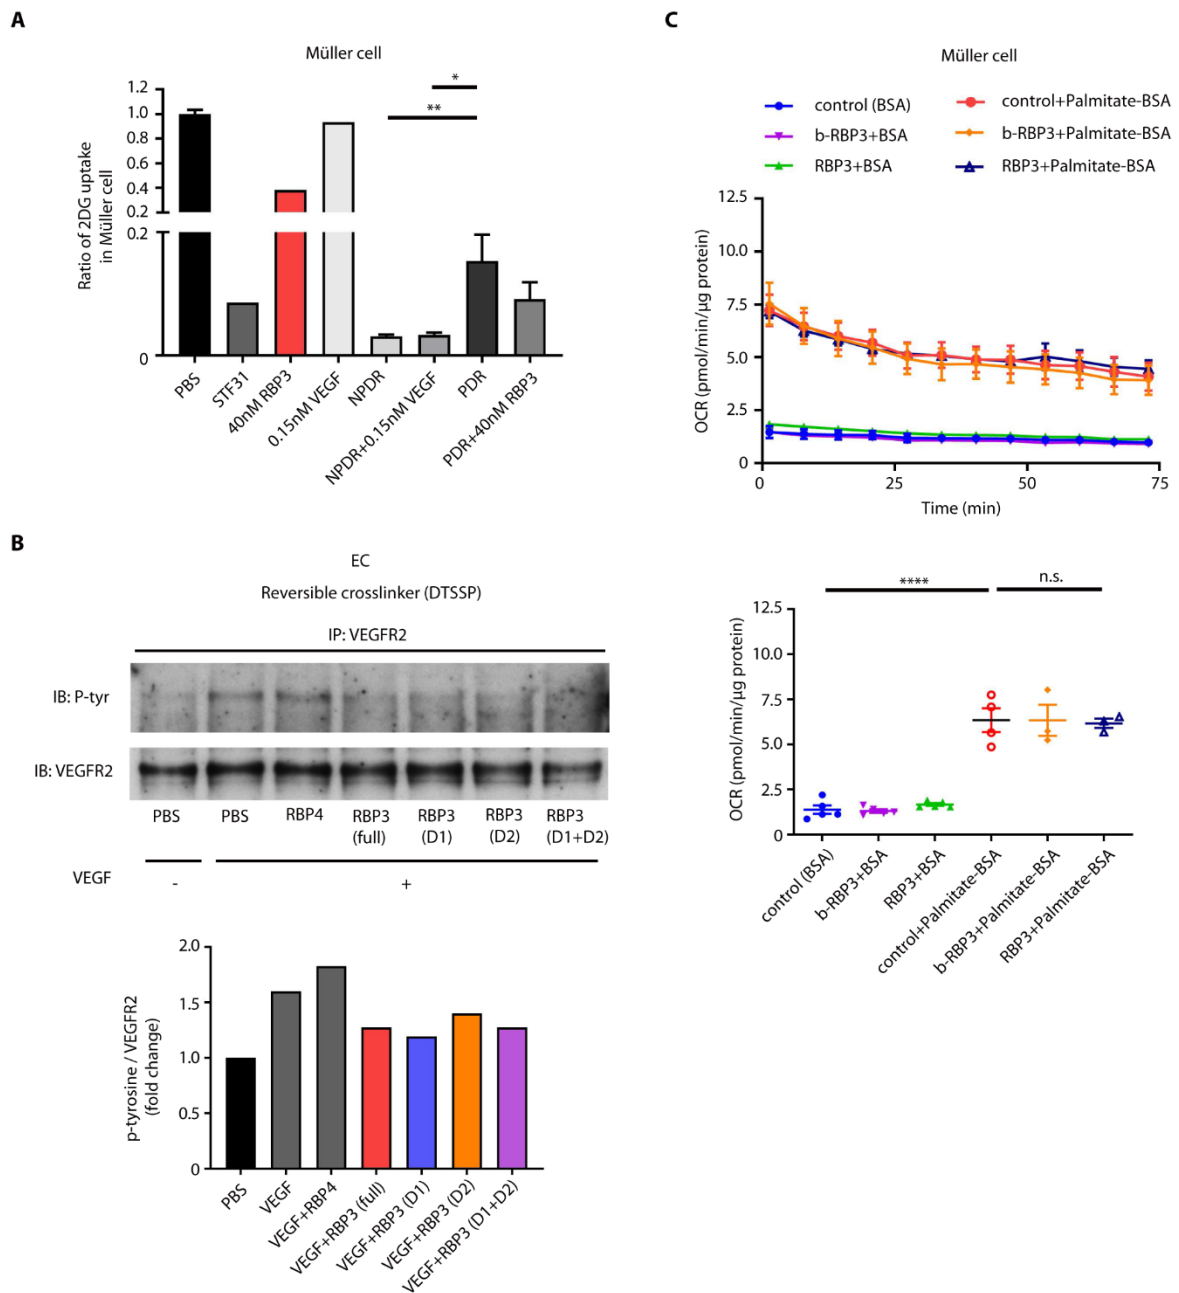

**Fig. S8. Effects of human vitreous or different peptide of hRBP3 on 2DG uptake, VEGF-induced pTyr-VEGFR2, and palmitate-induced OCR.**

(A) Effects of rhRBP3 (5  $\mu\text{g/mL}$ , 40 nM) or human vitreous from NPDR (RBP3;  $15.7 \pm 2.2$

nM, VEGF;  $8.6 \pm 1.6$  pM), PDR (RBP3;  $5.0 \pm 0.6$  nM, VEGF;  $196.1 \pm 69.2$  pM) on 2DG

uptake in Müller cell. T-test was used to evaluate the difference between NPDR and PDR.  $n =$

3. **(B)** Effects of RBP4 (20 nM) or different peptide of rhRBP3 (20 nM) on VEGF (2.5 ng/mL)-induced tyrosine phosphorylation (p-tyrosine) of VEGFR2 in BAEC. full: full length of RBP3. D1: fragment of RBP3 (AA19-320, domain 1). D2: fragment of RBP3 (AA321-630, domain 2).  $n = 1$ . **(C)** Effects of rhRBP3 on palmitate-induced oxygen consumption ratio (OCR) in Müller cell. Cells were incubated with PBS, boiled rhRBP3 (b-RBP3), rhRBP3 (2.5  $\mu$ g/mL, 20 nM) for 1 hour in 0.2%BSA+KRB buffer (no glucose). 200  $\mu$ M of BSA or Palmitate-BSA was added to start seahorse assay.  $n = 4-6$ . All data are represented as mean  $\pm$  SEM. Group comparison was done by ANOVA (same as fig. S1, S2 and S4-S7).

**Figure S9**

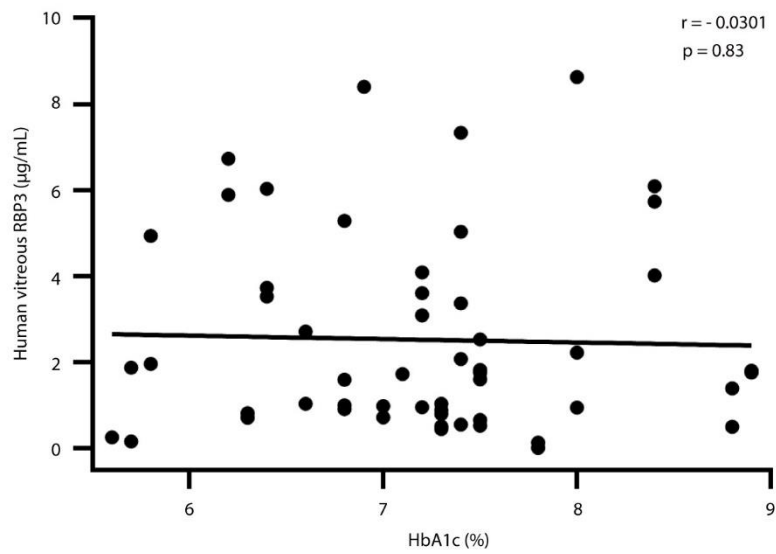

**Fig. S9. Human vitreous RBP3 concentrations and HbA1c.**

The correlation between human vitreous RBP3 concentrations and HbA1c plotted with a regression line. n=55.

**Figure S10**

**A**

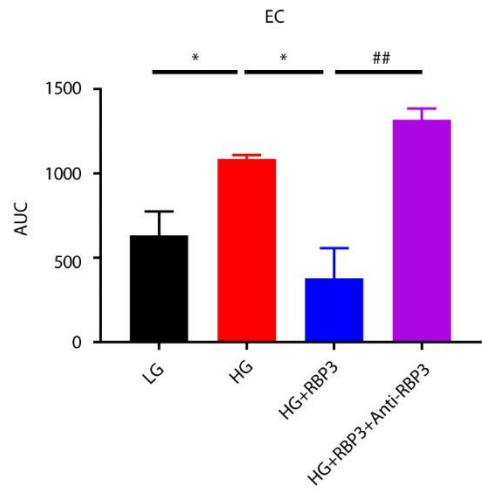

**B**

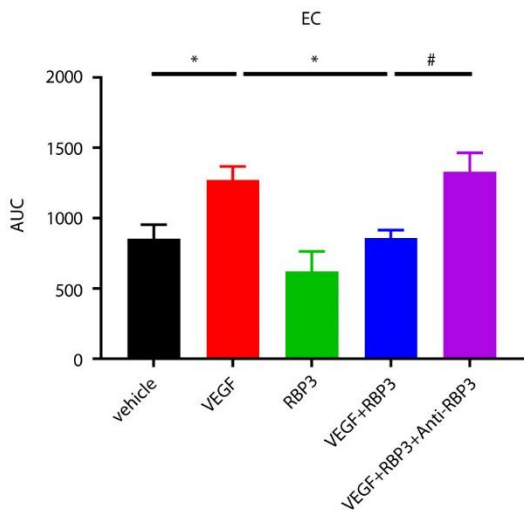

**C**

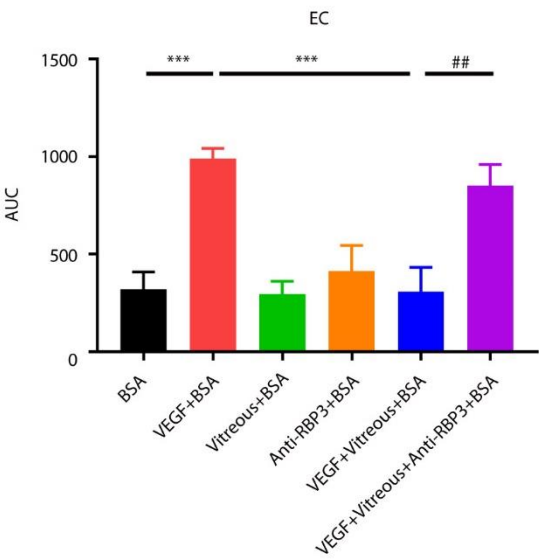

**Fig. S10. Effects of rhRBP3 or Medalist patient vitreous from protected eye on endothelial migration.**

Effects of rhRBP3 (0.25 $\mu$ g/mL, 2nM) or medalist patient vitreous from protected eye on 25mM glucose (HG) or rhVEGF (2.5ng/mL)-induced endothelial migration in bovine retinal endothelial cell (BREC). AUC for Fig. 5A-C. All data are represented as mean  $\pm$  SEM. Group comparison was done by ANOVA. (A) \*p<0.05 versus HG; <sup>##</sup>p<0.01 versus HG+RBP3. n=4. (B) \*p<0.05 versus VEGF; <sup>#</sup>p<0.05 versus VEGF+RBP3. n=4-5. (C) \*\*\*p<0.001 versus VEGF+BSA; <sup>##</sup>p<0.01 versus VEGF+Vitreous+BSA. n=3.

**Table S1. Clinical and demographic characteristics by disease status for Medalist patients included in proteomic analysis by mass spectroscopy.**

|                                     | <b>No-mild NPDR</b>                                   | <b>PDR</b>        |
|-------------------------------------|-------------------------------------------------------|-------------------|
| Total number                        | 4                                                     | 6                 |
| Number of medalist patients         | 4                                                     | 6                 |
|                                     | Percentage or Median [lower quartile, upper quartile] |                   |
| Age (years)                         | 79 [65, 86 ]                                          | 77 [71, 78]       |
| Gender (Female, %)                  | 25.0%                                                 | 33.3%             |
| Type of diabetes (Type 1, %)        | 100%                                                  | 100%              |
| Duration of disease (years)         | 64 [53, 76]                                           | 67 [57, 72]       |
| Age at diagnosis (years)            | 12 [6, 17]                                            | 8 [7, 10]         |
| HbA1c (%)                           | 7.3 [6.4, 8.2]                                        | 7.2 [6.6, 7.3]    |
| BMI (kg/m <sup>2</sup> )*           | 20.8 [17.8, 23.8] <sup>(2†)</sup>                     | 27.8 [22.7, 30.4] |
| Total Cholesterol (mg/dL)           | 155 [129,179]                                         | 156 [131, 158]    |
| Triglycerides (mg/dL)               | 71 [65, 86]                                           | 54 [43, 75]       |
| HDL (mg/dL)                         | 55 [49, 59]                                           | 62 [46, 75]       |
| LDL (mg/dL)                         | 83 [62, 108]                                          | 69 [65, 70]       |
| CRP (mg/L)*                         | 2.0 [0.6, 7.9]                                        | 1.8 [0.9, 3.3]    |
| eGFR (ml/min /1.73m <sup>2</sup> )* | 59.4 [48.1, 73.4]                                     | 47.7 [43.2, 71.8] |
| Hypertension (%)*                   | 50.0%                                                 | 83.3%             |
| Neuropathy (%)                      | 75.0%                                                 | 83.3%             |
| CVD (%)                             | 50.0%                                                 | 100%              |

DM= diabetes mellitus. PDR= proliferative diabetic retinopathy. BMI= body mass index.

HDL= high-density lipoprotein cholesterol. LDL= low-density lipoprotein cholesterol.

CRP= C-reactive protein. eGFR= estimated glomerular filtration rate. CVD= cardiovascular disease.

\*Available only in medalist patients. <sup>†</sup>Number lacking data. P-values were calculated by Kruskal-Wallis or Fisher's Exact Test.

**Table S2. Four candidates of up-regulated proteins selected by proteomic analysis in retina and vitreous of Medalist patients with no-mild NPDR (*n* = 6, protected) versus PDR (*n* = 11, nonprotected). *p* < 0.05 cutoff by Mann–Whitney U test.**

|                                                            | Retina      |         | Vitreous    |         |
|------------------------------------------------------------|-------------|---------|-------------|---------|
| Protein Name                                               | Fold change | P value | Fold change | P value |
| RBP3 Interphotoreceptor retinoid-binding protein precursor | 1.61        | 0.0444  | 1.88        | 0.0049  |
| PTPRZ1 Protein Tyrosine Phosphatase, Receptor Type Z1      | 1.33        | 0.0484  | 1.20        | 0.0480  |
| PPME1 Isoform 3 of Protein phosphatase methylesterase 1    | 1.20        | 0.0484  | 1.17        | 0.0484  |
| TNR Isoform 2 of Tenascin-R precursor                      | 1.48        | 0.0496  | 1.54        | 0.0428  |

**Table S3. RBP3 protein was selected from among the four candidates in table S2.**

| Protein Name                                                            | Retina <i>n</i> =17 eyes, 10 people     |                                 |                    |         | Vitreous <i>n</i> =17 eyes, 10 people   |                                 |                    |         |
|-------------------------------------------------------------------------|-----------------------------------------|---------------------------------|--------------------|---------|-----------------------------------------|---------------------------------|--------------------|---------|
| Retinol Binding Protein 3 (Interphotoreceptor retinoid-binding protein) | No-Mild NPDR <i>n</i> =6 eyes, 4 people | PDR <i>n</i> =11 eyes, 6 people | Fold-change (Mean) | P-value | No-Mild NPDR <i>n</i> =6 eyes, 4 people | PDR <i>n</i> =11 eyes, 6 people | Fold-change (Mean) | P-value |
| Peptide hit numbers (Median)                                            | 414.5                                   | 268                             | 1.61               | 0.04    | 560                                     | 269                             | 1.88               | <0.01   |

Total numbers of detected peptide hits of RBP3 were 318 (retina) and 327 (vitreous) in median of all subjects. The selecting criteria was a minimum 1.5-fold increase of peptide hit numbers with *p*-value <0.05 in both retina and vitreous. *P*-values were calculated using Mann–Whitney U test.

**Table S4. Clinical and demographic characteristics by disease status for individuals included in proteomics and ELISA assays.**

|                                      | Non-DM (NDM)                                          | No-Mild NPDR                      | Moderate NPDR                     | #PDR              |
|--------------------------------------|-------------------------------------------------------|-----------------------------------|-----------------------------------|-------------------|
| Total number (eyes, subjects)        | 17[13]                                                | 30[19]                            | 9[8]                              | 23[14]            |
| Number of medalist patients          | 0                                                     | 12                                | 7                                 | 14                |
| Number of non-medalist patients      | 13                                                    | 7                                 | 1                                 | 0                 |
|                                      | Percentage or Median [lower quartile, upper quartile] |                                   |                                   |                   |
| Age (years)                          | 78 [73, 83] <sup>(1†)</sup>                           | 81 [77, 86]                       | 75 [64.5, 83.5]                   | 76[73, 87]        |
| Gender (Female, %)                   | 50% <sup>(1†)</sup>                                   | 42.1%                             | 50.0%                             | 57.1%             |
| Type of diabetes (Type 1, %)*        | N/A                                                   | 68.4.%                            | 100%                              | 100%              |
| Duration of disease (years)*         | N/A                                                   | 56 [35-60] <sup>(2†)</sup>        | 54.5[50.5-63.0]                   | 63.5[57-75]       |
| Age at diagnosis (years) **          | N/A                                                   | 20 [15-47] <sup>(3†)</sup>        | 13[6-18.5]                        | 8[4-12]           |
| HbA1c (%)                            | N/A                                                   | 7.0 [6.5, 7.5] <sup>(3†)</sup>    | 7.4 [5.8, 8.4] <sup>(1†)</sup>    | 7.3 [7.1, 7.5]    |
| BMI (kg/m <sup>2</sup> ) ^           | N/A                                                   | 25.1 [22.5, 29.0] <sup>(7†)</sup> | 28.3 [23.8, 29.1] <sup>(2†)</sup> | 26.6 [21.8, 32.4] |
| Total Cholesterol (mg/dL)            | N/A                                                   | 142 [122, 158] <sup>(4†)</sup>    | 138 [134, 162] <sup>(1†)</sup>    | 155 [135, 162]    |
| Triglycerides (mg/dL)                | N/A                                                   | 80.5 [53, 137] <sup>(5†)</sup>    | 61 [41, 71] <sup>(1†)</sup>       | 64.5 [41, 83]     |
| HDL (mg/dL)                          | N/A                                                   | 51 [45, 70] <sup>(6†)</sup>       | 60 [59, 72] <sup>(1†)</sup>       | 61.5 [49, 75]     |
| LDL (mg/dL)                          | N/A                                                   | 66 [57, 76] <sup>(6†)</sup>       | 55 [52, 76] <sup>(1†)</sup>       | 74 [55, 89]       |
| CRP (mg/L) ^                         | N/A                                                   | 0.74[0.5-0.9] <sup>(7†)</sup>     | 1.00[0.6-1.3] <sup>(3†)</sup>     | 0.90 [0.6-3.3]    |
| eGFR (ml/min /1.73m <sup>2</sup> ) ^ | N/A                                                   | 52.4 [41.7, 63.8] <sup>(7†)</sup> | 59.3 [56.1, 60.9] <sup>(1†)</sup> | 59.2 [45.6, 91.2] |
| Hypertension (%) ^                   | N/A                                                   | 57.9% <sup>(5†)</sup>             | 75.0%                             | 78.6%             |

|                |     |                       |       |                       |
|----------------|-----|-----------------------|-------|-----------------------|
| Neuropathy (%) | N/A | 47.3 <sup>(5†)</sup>  | 62.5% | 64.3% <sup>(2†)</sup> |
| CVD (%)        | N/A | 42.1% <sup>(4†)</sup> | 62.5% | 92.9%                 |

DM= diabetes mellitus. DR= diabetic retinopathy. NPDR= non-proliferative DR. PDR= proliferative DR. BMI= body mass index. HDL= high-density lipoprotein cholesterol. LDL= low-density lipoprotein cholesterol. CRP= C-reactive protein. eGFR= estimated glomerular filtration rate. CVD= cardiovascular disease. From 54 unique subjects, 2 medalist patients have different diabetic retinopathy grades in eyes.

<sup>#</sup>All PDR are quiescent PDR. <sup>^</sup>Available only in medalist patients. <sup>†</sup>Number lacking data. Group comparison was done by Kruskal–Wallis test and Chi-square test where applicable. \* $p < 0.05$ , \*\* $p < 0.01$ .

**Table S5. Up-regulated proteins in the retina from Joslin Medalist patients: protected versus nonprotected.**

| Protein Name                                                                                              | Fold change | p value  |
|-----------------------------------------------------------------------------------------------------------|-------------|----------|
| COX5A Cytochrome c oxidase subunit 5A, mitochondrial precursor                                            | 1.81        | 0.001495 |
| C3orf28 E2-induced gene 5 protein                                                                         | 2.20        | 0.002060 |
| LGALS3 MGC148757 protein                                                                                  | 0.29        | 0.002120 |
| STX12 Syntaxin 12                                                                                         | 1.81        | 0.002293 |
| LOC644934 similar to ribosomal protein S26                                                                | 1.53        | 0.002938 |
| ATP5J ATP synthase, H <sup>+</sup> transporting, mitochondrial F0 complex, subunit F6 isoform b precursor | 1.70        | 0.002970 |
| HMOX2 Heme oxygenase 2                                                                                    | 1.75        | 0.003361 |
| - cDNA FLJ61278, highly similar to Protein-arginine deiminase type-2                                      | 0.45        | 0.003420 |
| STX3 Isoform A of Syntaxin-3                                                                              | 1.59        | 0.003501 |
| NDUFA4 NADH dehydrogenase [ubiquinone] 1 alpha subcomplex subunit 4                                       | 1.51        | 0.003666 |
| PPA2 Isoform 1 of Inorganic pyrophosphatase 2, mitochondrial precursor                                    | 1.46        | 0.005624 |
| NDUFA5 NADH dehydrogenase [ubiquinone] 1 alpha subcomplex subunit 5                                       | 1.48        | 0.006326 |
| VDAC1 Voltage-dependent anion-selective channel protein 1                                                 | 1.62        | 0.006656 |
| CD44 Isoform 4 of CD44 antigen                                                                            | 0.48        | 0.007587 |
| NDUFA6 NADH dehydrogenase (ubiquinone) 1 alpha subcomplex, 6, 14kDa                                       | 1.67        | 0.008046 |
| DNAJC5 Isoform 1 of DnaJ homolog subfamily C member 5                                                     | 1.95        | 0.008516 |
| CST3;CST2 Cystatin-C precursor                                                                            | 1.86        | 0.008759 |
| CRYAA Alpha-crystallin A chain                                                                            | 0.58        | 0.008889 |
| ACTG1 Actin, cytoplasmic 2                                                                                | 0.68        | 0.008931 |
| ABHD14B Isoform 1 of Abhydrolase domain-containing protein 14B                                            | 0.55        | 0.009089 |
| ALDH9A1 4-trimethylaminobutyraldehyde dehydrogenase                                                       | 0.62        | 0.010148 |
| NDUFB6 NADH dehydrogenase [ubiquinone] 1 beta subcomplex subunit 6                                        | 1.44        | 0.011467 |
| GOLPH3 Golgi phosphoprotein 3                                                                             | 1.33        | 0.012660 |

|                                                                                                  |      |          |
|--------------------------------------------------------------------------------------------------|------|----------|
| MRPS26 28S ribosomal protein S26, mitochondrial                                                  | 1.30 | 0.012660 |
| TOMM20 Mitochondrial import receptor subunit TOM20 homolog                                       | 1.73 | 0.012660 |
| LRG1 Leucine-rich alpha-2-glycoprotein precursor                                                 | 1.60 | 0.012660 |
| AGT Angiotensinogen precursor                                                                    | 1.43 | 0.012660 |
| PTMA Putative uncharacterized protein                                                            | 1.50 | 0.012660 |
| HMGN1 High-mobility group nucleosome binding domain 1                                            | 2.97 | 0.012660 |
| UQCRB UQCRB protein                                                                              | 1.43 | 0.013171 |
| PCCA propionyl-Coenzyme A carboxylase, alpha polypeptide isoform b                               | 1.51 | 0.013996 |
| LOC153364 Isoform 2 of Beta-lactamase-like protein FLJ75971                                      | 1.64 | 0.014325 |
| MTX1 metaxin 1 isoform 1                                                                         | 1.57 | 0.014660 |
| RGS9 Isoform 3 of Regulator of G-protein signaling 9                                             | 1.62 | 0.014930 |
| DLAT Pyruvate dehydrogenase complex component E2                                                 | 1.58 | 0.015224 |
| BASP1 Brain acid soluble protein 1                                                               | 1.48 | 0.015605 |
| IDH3B Isocitrate dehydrogenase 3, beta subunit isoform a precursor                               | 1.77 | 0.015605 |
| VAMP2 Uncharacterized protein VAMP2                                                              | 1.88 | 0.015797 |
| NUCB1 Nucleobindin-1                                                                             | 1.75 | 0.016661 |
| RHOG Rho-related GTP-binding protein RhoG                                                        | 0.67 | 0.017257 |
| LCN1 Lipocalin-1 precursor                                                                       | 1.49 | 0.017708 |
| VDAC2 Voltage-dependent anion-selective channel protein 2                                        | 1.62 | 0.017831 |
| CEND1 Cell cycle exit and neuronal differentiation protein 1                                     | 2.08 | 0.017989 |
| RGR retinal G-protein coupled receptor isoform 1                                                 | 0.41 | 0.018884 |
| ARPC5L Actin-related protein 2/3 complex subunit 5-like protein                                  | 0.64 | 0.018958 |
| NDUFA12 13kDa differentiation-associated protein variant (Fragment)                              | 1.58 | 0.019871 |
| RPS3 40S ribosomal protein S3                                                                    | 0.65 | 0.020179 |
| PTGDS Prostaglandin D2 synthase 21kDa                                                            | 1.91 | 0.020489 |
| - Transthyretin                                                                                  | 2.66 | 0.020489 |
| CLTC Isoform 2 of Clathrin heavy chain 1                                                         | 1.43 | 0.020800 |
| KIAA1576 Probable oxidoreductase KIAA1576                                                        | 0.55 | 0.023567 |
| ACO2 Aconitase 2, mitochondrial                                                                  | 1.40 | 0.023653 |
| NDUFB11 Isoform 2 of NADH dehydrogenase [ubiquinone] 1 beta subcomplex subunit 11, mitochondrial | 1.81 | 0.024967 |

|                                                                          |      |          |
|--------------------------------------------------------------------------|------|----------|
| COX7A2 Uncharacterized protein COX7A2                                    | 2.24 | 0.025477 |
| RAB6A Isoform 2 of Ras-related protein Rab-6A                            | 0.81 | 0.025912 |
| ACSL6 79 kDa protein                                                     | 1.84 | 0.025912 |
| REEP6 Receptor expression-enhancing protein 6                            | 1.52 | 0.026749 |
| ANXA1 Annexin A1                                                         | 0.32 | 0.026843 |
| PTBP1 Isoform 2 of Polypyrimidine tract-binding protein 1                | 0.63 | 0.028118 |
| COX6B1 12 kDa protein                                                    | 1.31 | 0.028230 |
| PGM5 Isoform 2 of Phosphoglucomutase-like protein 5                      | 0.70 | 0.028389 |
| ATIC Bifunctional purine biosynthesis protein PURH                       | 0.47 | 0.029383 |
| HINT2 Histidine triad nucleotide-binding protein 2                       | 1.70 | 0.029995 |
| RAB18 Ras-related protein Rab-18                                         | 1.19 | 0.030402 |
| RNF170 Isoform 5 of RING finger protein 170                              | 0.73 | 0.031409 |
| GPX3 Glutathione peroxidase 3 precursor                                  | 1.96 | 0.032084 |
| IDH3G Isocitrate dehydrogenase [NAD] subunit gamma, mitochondrial        | 1.63 | 0.032084 |
| EGFR Isoform 3 of Epidermal growth factor receptor                       | 1.50 | 0.032198 |
| NDUFA2 NADH dehydrogenase [ubiquinone] 1 alpha subcomplex subunit 2      | 1.34 | 0.033332 |
| VCL Isoform 2 of Vinculin                                                | 0.57 | 0.033481 |
| MTPN Myotrophin                                                          | 0.71 | 0.033527 |
| LARS2 Probable leucyl-tRNA synthetase, mitochondrial                     | 1.31 | 0.033827 |
| ATP5L ATP synthase subunit g, mitochondrial                              | 1.44 | 0.034143 |
| FHL1 Four and a half LIM domains 1                                       | 0.56 | 0.034253 |
| BCL2L13 35 kDa protein                                                   | 1.58 | 0.034253 |
| UBC;UBB;RPS27A 79 kDa protein                                            | 1.69 | 0.034808 |
| SELENBP1 54 kDa protein                                                  | 0.56 | 0.034971 |
| ACOX1 Isoform 2 of Peroxisomal acyl-coenzyme A oxidase 1                 | 1.35 | 0.035440 |
| FECH Ferrochelatase, mitochondrial precursor                             | 1.46 | 0.036936 |
| COX5B Cytochrome c oxidase subunit 5B, mitochondrial precursor           | 1.45 | 0.037093 |
| LAP3 Isoform 2 of Cytosol aminopeptidase                                 | 0.66 | 0.038166 |
| TPT1 Translationally-controlled tumor protein                            | 0.67 | 0.038525 |
| PRPF19 Pre-mRNA-processing factor 19                                     | 1.28 | 0.038765 |
| TOMM70A Mitochondrial precursor proteins import receptor                 | 1.53 | 0.038765 |
| MSN Uncharacterized protein MSN (Fragment)                               | 0.53 | 0.039126 |
| COX4I1 Cytochrome c oxidase subunit 4 isoform 1, mitochondrial precursor | 1.57 | 0.039247 |

|                                                                                          |      |          |
|------------------------------------------------------------------------------------------|------|----------|
| GFM1 66 kDa protein                                                                      | 1.34 | 0.039857 |
| NDUFA13 cell death-regulatory protein GRIM19                                             | 1.62 | 0.040425 |
| GDPD1 Isoform 2 of Glycerophosphodiester phosphodiesterase domain-containing protein 1   | 1.49 | 0.042808 |
| PTGES2 Prostaglandin E synthase 2                                                        | 1.56 | 0.044033 |
| MARCKS Myristoylated alanine-rich C-kinase substrate                                     | 1.60 | 0.044033 |
| GSN Isoform 1 of Gelsolin precursor                                                      | 0.62 | 0.044293 |
| CNDP2 Cytosolic non-specific dipeptidase                                                 | 0.68 | 0.044293 |
| GOT2 Aspartate aminotransferase, mitochondrial precursor                                 | 1.60 | 0.044423 |
| RBP3 Interphotoreceptor retinoid-binding protein precursor                               | 1.61 | 0.044423 |
| MXRA7 Isoform 3 of Matrix-remodeling-associated protein 7                                | 1.65 | 0.045588 |
| SPCS2 hypothetical protein                                                               | 0.69 | 0.046530 |
| LYPLA1 Isoform 2 of Acyl-protein thioesterase 1                                          | 1.32 | 0.047223 |
| NDUFB4 Putative uncharacterized protein (Fragment)                                       | 1.42 | 0.047706 |
| BCAM basal cell adhesion molecule isoform 2 precursor                                    | 0.69 | 0.047779 |
| BCS1L Mitochondrial chaperone BCS1                                                       | 1.20 | 0.047968 |
| COL3A1 Isoform 1 of Collagen alpha-1(III) chain                                          | 1.13 | 0.047968 |
| PDCD5 Programmed cell death protein 5                                                    | 1.13 | 0.047968 |
| PCDH1 protocadherin 1 isoform 1 precursor                                                | 1.20 | 0.047968 |
| TST Thiosulfate sulfurtransferase                                                        | 1.20 | 0.047968 |
| RHOT1 ras homolog gene family, member T1 isoform 2                                       | 1.20 | 0.047968 |
| CCDC47 Isoform 2 of Coiled-coil domain-containing protein 47                             | 1.13 | 0.047968 |
| HSPA4L cDNA FLJ55529, highly similar to Heat shock 70 kDa protein 4L                     | 1.13 | 0.047968 |
| RABL4 Protein                                                                            | 1.13 | 0.047968 |
| SNRPD1 16 kDa protein                                                                    | 1.53 | 0.047968 |
| IPIr00871555                                                                             | 1.27 | 0.047968 |
| GAA acid alpha-glucosidase preproprotein                                                 | 1.24 | 0.048058 |
| EIF3D Eukaryotic translation initiation factor 3 subunit D                               | 1.17 | 0.048406 |
| SEPT4 cDNA FLJ55761, highly similar to Septin-4                                          | 1.17 | 0.048406 |
| DNAJA1 DnaJ homolog subfamily A member 1                                                 | 1.30 | 0.048406 |
| LETM1 Leucine zipper-EF-hand-containing transmembrane protein 1, mitochondrial precursor | 1.33 | 0.048406 |
| SLC4A7 Isoform 3 of Sodium bicarbonate cotransporter 3                                   | 1.37 | 0.048406 |
| TRIM36 Tripartite motif-containing protein 36                                            | 1.17 | 0.048406 |
| MLF2 Myeloid leukemia factor 2                                                           | 1.17 | 0.048406 |

|                                                                                   |      |          |
|-----------------------------------------------------------------------------------|------|----------|
| M6PR Cation-dependent mannose-6-phosphate receptor                                | 1.33 | 0.048406 |
| - 22 kDa protein                                                                  | 1.17 | 0.048406 |
| TMEM109 Transmembrane protein 109 precursor                                       | 1.37 | 0.048406 |
| MAP4 Isoform 3 of Microtubule-associated protein 4                                | 1.17 | 0.048406 |
| PCNP Isoform 2 of PEST proteolytic signal-containing nuclear protein              | 1.23 | 0.048406 |
| TXNDC10 Isoform 1 of Protein disulfide-isomerase TXNDC10                          | 1.17 | 0.048406 |
| UBQLN1 Isoform 1 of Ubiquilin-1                                                   | 1.40 | 0.048406 |
| CHMP5 Charged multivesicular body protein 5                                       | 1.20 | 0.048406 |
| LOC255374 Beta-lactamase-like protein LOC255374                                   | 1.37 | 0.048406 |
| PCP2 Purkinje cell protein 2 homolog                                              | 1.47 | 0.048406 |
| H2AFZ Histone H2A.Z                                                               | 1.27 | 0.048406 |
| FABP3 Fatty acid-binding protein, heart                                           | 1.30 | 0.048406 |
| CRYBA2 Beta-crystallin A2                                                         | 1.17 | 0.048406 |
| FRZB Secreted frizzled-related protein 3                                          | 1.47 | 0.048406 |
| LSM4 U6 snRNA-associated Sm-like protein LSM4                                     | 1.27 | 0.048406 |
| CHMP6 Charged multivesicular body protein 6                                       | 1.40 | 0.048406 |
| RGS9BP Regulator of G-protein signaling 9-binding protein                         | 1.27 | 0.048406 |
| IPI00396023                                                                       | 1.27 | 0.048406 |
| PPME1 Isoform 3 of Protein phosphatase methylesterase 1                           | 1.20 | 0.048406 |
| ATP6V1H Isoform 2 of Vacuolar proton pump subunit H                               | 1.27 | 0.048406 |
| MAP6 Isoform 1 of Microtubule-associated protein 6                                | 1.43 | 0.048406 |
| TCEAL3 Transcription elongation factor A protein-like 3                           | 1.50 | 0.048406 |
| CPLX3 Complexin-3                                                                 | 1.33 | 0.048406 |
| TARS2 Threonyl-tRNA synthetase, mitochondrial                                     | 1.20 | 0.048406 |
| SURF4 Surfeit 4                                                                   | 1.23 | 0.048406 |
| SNRPC Small nuclear ribonucleoprotein polypeptide C                               | 1.57 | 0.048406 |
| PPIH Peptidyl-prolyl cis-trans isomerase                                          | 1.27 | 0.048406 |
| CTPS2 CTP synthase 2                                                              | 1.23 | 0.048406 |
| TIMM50 Isoform 1 of Mitochondrial import inner membrane translocase subunit TIM50 | 1.30 | 0.048406 |
| LOC650883 similar to KIAA1990 protein                                             | 1.17 | 0.048406 |
| INSR insulin receptor isoform Short precursor                                     | 1.23 | 0.048406 |
| GAP43 24 kDa protein                                                              | 1.17 | 0.048406 |
| PNPLA6 Isoform 1 of Neuropathy target esterase                                    | 1.20 | 0.048406 |
| SLC25A36 Isoform 3 of Solute carrier family 25 member 36                          | 1.20 | 0.048406 |
| - PC1/MRPS28 fusion protein                                                       | 1.23 | 0.048406 |

|                                                                               |      |          |
|-------------------------------------------------------------------------------|------|----------|
| PTPRZ1 265 kDa protein                                                        | 1.33 | 0.048406 |
| - cDNA FLJ60514, highly similar to Fructosamine-3-kinase                      | 1.37 | 0.048406 |
| TNR Isoform 2 of Tenascin-R precursor                                         | 1.48 | 0.049596 |
| NSDHL Sterol-4-alpha-carboxylate 3-dehydrogenase, decarboxylating             | 1.22 | 0.049715 |
| CLSTN1 Isoform 1 of Calsyntenin-1 precursor (Fragment)                        | 1.45 | 0.049969 |
| PODXL podocalyxin-like isoform 1 precursor                                    | 1.35 | 0.049969 |
| CCDC90B Isoform 2 of Coiled-coil domain-containing protein 90B, mitochondrial | 1.46 | 0.049969 |

Joslin medalist patients with no-mild NPDR (n=6, Protected) vs. PDR (n=11, Non-protected). Values are expressed as fold change and p value was calculated using Mann–Whitney U test. The data are sorted by P value using  $p < 0.05$  cut off.

**Table S6. Up-regulated proteins in the vitreous from Joslin Medalist patients: protected versus nonprotected.**

| Protein Name                                                                                    | Fold change | p value |
|-------------------------------------------------------------------------------------------------|-------------|---------|
| HMGB1 High-mobility group box 1                                                                 | 1.90        | 0.00294 |
| XRCC5 Putative uncharacterized protein XRCC5                                                    | 3.33        | 0.00297 |
| - cDNA FLJ59582, highly similar to Ras-related protein Rab-3A                                   | 2.60        | 0.00297 |
| RBP3 Interphotoreceptor retinoid-binding protein precursor                                      | 1.88        | 0.00487 |
| APLP2 Isoform 1 of Amyloid-like protein 2 precursor                                             | 3.07        | 0.00536 |
| CHL1 Isoform 1 of Neural cell adhesion molecule L1-like protein precursor                       | 1.62        | 0.00564 |
| NCL Isoform 2 of Nucleolin                                                                      | 1.77        | 0.00876 |
| OTUB1 Isoform 1 of Ubiquitin thioesterase OTUB1                                                 | 1.83        | 0.00876 |
| CFD Complement factor D preproprotein                                                           | 0.54        | 0.00876 |
| SNCB Beta-synuclein                                                                             | 2.45        | 0.00882 |
| SEZ6 Isoform 3 of Seizure protein 6 homolog precursor                                           | 1.77        | 0.00882 |
| OLA1 Isoform 1 of Obg-like ATPase 1                                                             | 1.49        | 0.01043 |
| ST13 Hsc70-interacting protein                                                                  | 1.48        | 0.01050 |
| PFKL cDNA FLJ30173 fis, clone BRACE2000969, highly similar to 6-phosphofructokinase, liver type | 1.54        | 0.01050 |
| FKBP3 FK506-binding protein 3                                                                   | 1.27        | 0.01254 |
| ARL3 ADP-ribosylation factor-like protein 3                                                     | 1.33        | 0.01254 |
| MAPRE3 25 kDa protein                                                                           | 1.37        | 0.01254 |
| AARS Alanyl-tRNA synthetase, cytoplasmic                                                        | 1.61        | 0.01263 |
| ARPC2 Actin-related protein 2/3 complex subunit 2                                               | 1.40        | 0.01266 |
| SH3GL2 Endophilin-A1                                                                            | 1.67        | 0.01266 |
| RAB11B Ras-related protein Rab-11B                                                              | 1.50        | 0.01266 |
| CNTN1 Isoform 2 of Contactin-1 precursor                                                        | 1.60        | 0.01266 |
| - cDNA FLJ59539, highly similar to Secernin-1                                                   | 1.40        | 0.01266 |
| PCBP1 Poly(rC)-binding protein 1                                                                | 1.67        | 0.01266 |
| - 18 kDa protein                                                                                | 1.30        | 0.01266 |
| SPON1 Spondin-1 precursor                                                                       | 1.96        | 0.01640 |
| APEX1 DNA-(apurinic or apyrimidinic site) lyase                                                 | 2.32        | 0.01782 |
| TAGLN Transgelin                                                                                | 2.43        | 0.01782 |
| HSPA4 Heat shock 70 kDa protein 4                                                               | 2.34        | 0.01857 |
| LOC646817 similar to template activating factor-I alpha                                         | 1.83        | 0.01857 |

|                                                                                        |      |         |
|----------------------------------------------------------------------------------------|------|---------|
| B3GNT1 N-acetyllactosaminide<br>beta-1,3-N-acetylglucosaminyltransferase               | 1.92 | 0.01921 |
| GLOD4 Isoform 2 of Glyoxalase domain-containing protein 4                              | 1.63 | 0.02093 |
| BTD Uncharacterized protein BTD (Fragment)                                             | 1.59 | 0.02210 |
| FGB Fibrinogen beta chain precursor                                                    | 1.93 | 0.02564 |
| LGALS3BP Galectin-3-binding protein precursor                                          | 1.28 | 0.02878 |
| COL18A1 Isoform 2 of Collagen alpha-1(XVIII) chain<br>precursor                        | 1.62 | 0.02945 |
| NRCAM Isoform 3 of Neuronal cell adhesion molecule<br>precursor                        | 1.98 | 0.02945 |
| hCG_1983058 hypothetical protein LOC644820                                             | 1.42 | 0.03186 |
| SOD3 Extracellular superoxide dismutase [Cu-Zn] precursor                              | 2.06 | 0.03252 |
| APLP1 amyloid precursor-like protein 1 isoform 1 precursor                             | 2.02 | 0.03321 |
| CUTA Isoform B of Protein CutA precursor                                               | 1.31 | 0.03384 |
| SH3BGRL 13 kDa protein                                                                 | 1.27 | 0.03384 |
| PLG Plasminogen precursor                                                              | 0.53 | 0.03425 |
| A2M Alpha-2-macroglobulin precursor                                                    | 1.71 | 0.03481 |
| FCGBP IgGfC-binding protein precursor                                                  | 2.98 | 0.03757 |
| LRP2 Low-density lipoprotein receptor-related protein 2<br>precursor                   | 1.75 | 0.03943 |
| OAF Out at first protein homolog precursor                                             | 2.13 | 0.03943 |
| ANP32A ANP32A protein (Fragment)                                                       | 1.92 | 0.03943 |
| HNRNPD HNRPD protein                                                                   | 1.99 | 0.03943 |
| DPYSL3 Dihydropyrimidinase-related protein 3                                           | 2.37 | 0.03943 |
| TIMP2 22 kDa protein                                                                   | 1.37 | 0.04203 |
| CLEC3B Putative uncharacterized protein DKFZp686H17246                                 | 0.51 | 0.04209 |
| ACP1 Acid phosphatase 1, soluble                                                       | 1.49 | 0.04219 |
| PPP1R7 Isoform 1 of Protein phosphatase 1 regulatory subunit<br>7                      | 1.29 | 0.04258 |
| HDHD2 Isoform 1 of Haloacid dehalogenase-like hydrolase<br>domain-containing protein 2 | 1.43 | 0.04258 |
| ATP6V1E1 Vacuolar proton pump subunit E 1                                              | 1.83 | 0.04281 |
| TNR Isoform 2 of Tenascin-R precursor                                                  | 1.54 | 0.04281 |
| EIF4A2 Isoform 1 of Eukaryotic initiation factor 4A-II                                 | 1.97 | 0.04283 |
| TKT Transketolase variant (Fragment)                                                   | 2.54 | 0.04283 |
| NCAM1 neural cell adhesion molecule 1 isoform 2                                        | 1.39 | 0.04523 |

|                                                                                           |      |         |
|-------------------------------------------------------------------------------------------|------|---------|
| MAT2B Isoform 1 of Methionine adenosyltransferase 2 subunit beta                          | 1.13 | 0.04797 |
| NSF Vesicle-fusing ATPase                                                                 | 1.13 | 0.04797 |
| C6orf108 c-Myc-responsive protein Rcl                                                     | 1.27 | 0.04797 |
| PURA Transcriptional activator protein Pur-alpha                                          | 1.20 | 0.04797 |
| GALM Aldose 1-epimerase                                                                   | 1.33 | 0.04797 |
| COPS8 COP9 signalosome subunit 8 isoform 2                                                | 1.20 | 0.04797 |
| GNB3 GNB3 protein                                                                         | 1.47 | 0.04797 |
| PSMD1 Isoform 2 of 26S proteasome non-ATPase regulatory subunit 1                         | 1.33 | 0.04797 |
| MYH10 Isoform 2 of Myosin-10                                                              | 1.13 | 0.04797 |
| CACYBP cDNA FLJ36106 fis, clone TEST12021531, highly similar to Calcyclin-binding protein | 1.33 | 0.04797 |
| PSMA4 26 kDa protein                                                                      | 1.20 | 0.04797 |
| PTPRZ1 265 kDa protein                                                                    | 1.20 | 0.04797 |
| SEPT7 Putative uncharacterized protein DKFZp586I031                                       | 1.13 | 0.04797 |
| CLIC5;LOC100131610 chloride intracellular channel 5 isoform a                             | 1.13 | 0.04797 |
| ACTR2 Actin-related protein 2                                                             | 1.23 | 0.04841 |
| LANCL1 LanC-like protein 1                                                                | 1.17 | 0.04841 |
| HDGFRP3 Hepatoma-derived growth factor-related protein 3                                  | 1.30 | 0.04841 |
| ATP6V1B2 Vacuolar ATP synthase subunit B, brain isoform                                   | 1.30 | 0.04841 |
| PTPLAD1 Protein tyrosine phosphatase-like protein PTPLAD1                                 | 1.17 | 0.04841 |
| NAPA Alpha-soluble NSF attachment protein                                                 | 1.23 | 0.04841 |
| CTSL1 Cathepsin L1 precursor                                                              | 1.20 | 0.04841 |
| UNC119 Isoform A of Protein unc-119 homolog A                                             | 1.40 | 0.04841 |
| SEZ6L2 Isoform 3 of Seizure 6-like protein 2                                              | 1.17 | 0.04841 |
| NDRG1 Protein NDRG1                                                                       | 1.33 | 0.04841 |
| USO1 Putative uncharacterized protein DKFZp451D234                                        | 1.37 | 0.04841 |
| FDPS Farnesyl diphosphate synthase                                                        | 1.23 | 0.04841 |
| LXN Latexin                                                                               | 1.27 | 0.04841 |
| HEBP1 Heme-binding protein 1                                                              | 1.23 | 0.04841 |
| SFRS1 Isoform ASF-1 of Splicing factor, arginine/serine-rich 1                            | 1.40 | 0.04841 |
| APRT Adenine phosphoribosyltransferase                                                    | 1.23 | 0.04841 |
| PSMA2 Proteasome subunit alpha type-2                                                     | 1.30 | 0.04841 |
| CALB1 Calbindin                                                                           | 1.33 | 0.04841 |

|                                                                                   |      |         |
|-----------------------------------------------------------------------------------|------|---------|
| SERPINA7 Thyroxine-binding globulin                                               | 1.47 | 0.04841 |
| BLVRA Biliverdin reductase A precursor                                            | 1.47 | 0.04841 |
| NONO Non-POU domain-containing octamer-binding protein                            | 1.53 | 0.04841 |
| XPOT Exportin-T                                                                   | 1.23 | 0.04841 |
| TARS Threonyl-tRNA synthetase, cytoplasmic                                        | 1.27 | 0.04841 |
| ACLY ATP citrate lyase isoform 2                                                  | 1.23 | 0.04841 |
| PPME1 Isoform 3 of Protein phosphatase methylesterase 1                           | 1.17 | 0.04841 |
| AP1B1 Isoform B of AP-1 complex subunit beta-1                                    | 1.23 | 0.04841 |
| MAP2 Isoform 3 of Microtubule-associated protein 2                                | 1.37 | 0.04841 |
| FLNB Filamin B                                                                    | 1.30 | 0.04841 |
| PSMD13 HSPC027                                                                    | 1.20 | 0.04841 |
| PGM2 Phosphoglucomutase-2                                                         | 1.47 | 0.04841 |
| TPP2 Tripeptidyl peptidase II                                                     | 1.53 | 0.04841 |
| ANP32E Acidic                                                                     | 1.47 | 0.04841 |
| HNRNPU cDNA FLJ54020, highly similar to Heterogeneous nuclear ribonucleoprotein U | 2.07 | 0.04841 |
| PACSIN1 Protein kinase C and casein kinase substrate in neurons 1                 | 1.30 | 0.04841 |
| PHYHIPL Isoform 2 of Phytanoyl-CoA hydroxylase-interacting protein-like           | 1.23 | 0.04841 |
| SUB1 LOC533984 protein                                                            | 1.40 | 0.04841 |
| EIF3B Isoform 2 of Eukaryotic translation initiation factor 3 subunit B           | 1.17 | 0.04841 |
| FAM169A Isoform 1 of UPF0611 protein FAM169A                                      | 1.23 | 0.04841 |
| LOC652147 hypothetical protein, partial                                           | 1.17 | 0.04841 |
| GARS Glycyl-tRNA synthetase                                                       | 1.27 | 0.04841 |
| KTN1 kinectin 1 isoform b                                                         | 1.33 | 0.04841 |
| IGLV1-40 V1-13 protein (Fragment)                                                 | 1.30 | 0.04841 |
| SNX3 Isoform 1 of Sorting nexin-3                                                 | 1.17 | 0.04841 |
| TXNL1 hypothetical protein LOC509142                                              | 1.30 | 0.04841 |
| ANP32B 29 kDa protein                                                             | 1.23 | 0.04841 |
| PGM1 65 kDa protein                                                               | 1.20 | 0.04841 |
| GNB2L1 Guanine nucleotide-binding protein subunit beta-2-like 1                   | 1.23 | 0.04841 |
| KHSRP Isoform 2 of Far upstream element-binding protein 2                         | 1.20 | 0.04841 |
| AKAP12 Isoform 2 of A-kinase anchor protein 12                                    | 1.43 | 0.04841 |

|                                                                                |      |         |
|--------------------------------------------------------------------------------|------|---------|
| ILF2 Interleukin enhancer binding factor 2 variant (Fragment)                  | 1.23 | 0.04841 |
| DNM1 Isoform 2 of Dynamin-1                                                    | 1.37 | 0.04841 |
| - cDNA FLJ59206, highly similar to Eukaryotic translation initiation factor 4B | 1.30 | 0.04841 |
| - cDNA FLJ51276, highly similar to Secretogranin-2                             | 1.33 | 0.04841 |
| SERPINI1 Neuroserpin precursor                                                 | 1.58 | 0.04997 |

Joslin medalist patients with no-mild NPDR (n=6, Protected) vs. PDR (n=11, Non-protected). Values are expressed as fold change and p value was calculated using Mann–Whitney U test. The data are sorted by P value using  $p < 0.05$  cut off.

**Table S7. Primers sequences used in reverse transcription polymerase chain reaction.**

| Gene                                                          | Primers (5'-3') |                          | Access Number  |
|---------------------------------------------------------------|-----------------|--------------------------|----------------|
| <i>18s</i>                                                    | F               | GCTTAATTTGACTCAACACGGGA  | NR_003278.3    |
|                                                               | R               | AGCTATCAATCTGTCAATCCTGTC |                |
| <i>Vegf</i> (rat, mouse)                                      | F               | CTCGCAGTCCGAGCCGGAGA     | NM_001204384.1 |
|                                                               | R               | GGTGCAGCCTGGGACCACTTG    |                |
| <i>Vegf</i> (bovine)                                          | F               | TACCCAGATGAGATTGAGTT     | NM_001287044.1 |
|                                                               | R               | CCTTGCTTTATCTTTCTTTG     |                |
| <i>Il6</i> (rat)                                              | F               | TGATGCACTGTCAGAAAACA     | XM_011515390.2 |
|                                                               | R               | ACCAGAGCAGATTTTCAATAGGC  |                |
| <i>Il6</i> (mouse)                                            | F               | ACCAGAGGAAATTTTCAATAGGC  | NM_001314054.1 |
|                                                               | R               | TGATGCACTTGCAGAAAACA     |                |
| <i>Il6</i> (bovine)                                           | F               | GATGACTTCTGCTTTCCCTACC   | XM_019959556.1 |
|                                                               | R               | TTGTGGCTGGAGTGGTTATTAG   |                |
| <i>Glut-1</i> (rat)                                           | F               | TGATTGGTTCCTTCTCTGTGG    | NM_006516.2    |
|                                                               | R               | CCCAGGATCAGCATCTCAAAG    |                |
| <i>Glut-4</i> (rat)                                           | F               | ACTGGTCCTTGCTGTATTCTC    | NM_001042.2    |
|                                                               | R               | CCAAGTTGCATTGTAGCTCTG    |                |
| <i>Sglt-1</i> (rat)                                           | F               | TCCCTATTTACATCAAGGCTGG   | XM_011530331.1 |
|                                                               | R               | GGACAGAACGGAAGGTAGATC    |                |
| <i>Sglt-2</i> (rat)                                           | F               | TTCTCACACTCGCAATCTC      | NM_022590.2    |
|                                                               | R               | CCTCTAACTCTTCAGCATCCAG   |                |
| <i>Rbp3</i> (retinol binding protein 3, interstitial) (mouse) | F               | AGAGCACAAGGCTGAGATGG     | NM_015745.2    |
|                                                               | R               | CTCCGAGCTGCTGGTAGAAC     |                |
